# Supplementary material for: Scalable Gaussian processes for predicting the optical, physical, thermal, and mechanical properties of inorganic glasses with large datasets
Source: Royal Society of Chemistry journal article supplement (doi:10.1039/d0ma00764a), 2020-12-15
Supplement: d0ma00764a1.xlsx [file d0ma00764a1.xlsx]

## Sheet: TEC
Glass ID	INPUT FEATURES																																					OUTPUT
	SiO2	B2O3	Al2O3	MgO	CaO	BaO	Li2O	Na2O	K2O	Ag2O	Cs2O	Tl2O	BeO	NiO	CuO	ZnO	CdO	PbO	Ga2O3	Y2O3	La2O3	Gd2O3	Bi2O3	TiO2	ZrO2	TeO2	P2O5	V2O5	Nb2O5	Ta2O5	MoO3	WO3	H2O	Sm2O3	MgF2	PbF2	PbCl2	Thermal expansion coefficient (10^-6 /K)
1	26.88	0	0	0	0	0	0	0	0	0	0	0	0	0	0	0	0	0	0	0	0	0	0	0	0	0	0	0	0	0	0	0	0	0	0	73.12	0	8.76
2	0	0	0	0	0	0	0	0	0	0	0	0	0	0	0	0	0	0	0	0	0	0	0	0	0	0	0	0	26.58	0	0	73.42	0	0	0	0	0	7.086
3	0	0	0	0	0	0	0	0	0	0	0	0	0	0	0	0	0	0	0	0	0	0	0	0	0	0	7.98	92.02	0	0	0	0	0	0	0	0	0	7
4	0	0	0	0	0	0	0	0	0	0	0	0	0	0	0	0	0	0	0	0	0	0	0	0	0	0	9.12	86.35	0	0	0	4.53	0	0	0	0	0	8.4
5	0	0	0	0	0	0	0	0	0	0	0	0	0	0	0	0	0	0	0	0	0	0	0	0	0	0	10	90	0	0	0	0	0	0	0	0	0	7.8
6	0	0	0	0	0	0	0	0	0	0	0	0	0	0	0	0	0	0	0	0	0	0	0	0	0	0	10.03	89.97	0	0	0	0	0	0	0	0	0	10
7	0	0	0	0	0	0	0	0	0	0	0	0	0	0	0	0	0	0	0	0	0	0	0	0	0	0	10.22	89.78	0	0	0	0	0	0	0	0	0	10
8	0	0	0	0	0	0	0	0	0	0	0	0	0	0	0	0	0	0	0	0	0	0	0	0	0	0	12.1	87.9	0	0	0	0	0	0	0	0	0	9.6
9	0	0	0	0	0	0	0	0	0	0	0	0	0	0	0	0	0	0	0	0	0	0	0	0	0	0	16.33	83.67	0	0	0	0	0	0	0	0	0	9.2
10	0	0	0	0	0	0	0	0	0	0	0	0	0	0	0	0	0	0	0	0	0	0	0	0	0	0	18.08	72.08	0	0	0	9.84	0	0	0	0	0	7.5
11	0	0	0	0	0	0	0	0	0	0	0	0	0	0	0	0	0	0	0	0	0	0	0	0	0	0	18.78	74.87	0	0	6.35	0	0	0	0	0	0	8
12	0	0	0	0	0	0	0	0	0	0	0	0	0	0	0	0	0	0	0	0	0	0	0	0	0	0	18.98	0	0	0	81.02	0	0	0	0	0	0	11
13	0	0	0	0	0	0	0	0	0	0	0	0	0	0	0	0	0	0	0	0	0	0	0	0	0	0	20.64	79.36	0	0	0	0	0	0	0	0	0	8.1
14	78.3	0	0	0	0	0	0	0	0	0	0	0	0	0	0	0	0	0	0	0	0	0	0	0	0	0	21.7	0	0	0	0	0	0	0	0	0	0	1.5
15	0	0	0	0	0	0	0	0	0	0	0	0	0	0	0	0	0	0	0	0	0	0	0	0	0	0	23.05	0	0	0	76.95	0	0	0	0	0	0	11.6
16	0	0	0	0	0	0	0	0	0	0	0	0	0	0	0	0	0	0	0	0	0	0	0	0	0	0	23.75	0	0	0	76.25	0	0	0	0	0	0	11.5
17	0	0	0	0	0	0	0	0	0	0	0	0	0	0	0	0	0	0	0	0	0	0	0	0	0	0	25	45	0	0	0	30	0	0	0	0	0	7
18	0	0	0	0	0	0	0	0	0	0	0	0	0	0	0	0	0	0	0	0	0	0	0	0	0	0	25.06	74.94	0	0	0	0	0	0	0	0	0	8.2
19	0	0	0	0	0	0	0	0	0	0	0	0	0	0	0	0	0	0	0	0	0	0	0	0	0	0	26.73	0	0	0	73.27	0	0	0	0	0	0	11.8
20	0	0	0	0	0	0	0	0	0	0	0	0	0	0	0	0	0	0	0	0	0	0	0	0	0	0	27.77	57.56	0	0	0	14.67	0	0	0	0	0	7
21	0	0	0	0	0	0	0	0	0	0	0	0	0	0	0	0	0	0	0	0	0	0	0	0	0	0	28.04	71.96	0	0	0	0	0	0	0	0	0	8.2
22	0	0	0	0	0	0	0	0	0	0	0	0	0	0	0	0	0	0	0	0	0	0	0	0	0	0	28.71	0	0	0	71.29	0	0	0	0	0	0	13.2
23	0	0	0	0	0	0	0	0	0	0	0	0	0	0	0	0	0	0	0	0	0	0	0	0	0	0	29.11	0	0	0	70.89	0	0	0	0	0	0	13.2
24	0	0	0	0	0	0	0	0	0	0	0	0	0	0	0	0	0	0	0	0	0	0	0	0	0	0	29.68	70.32	0	0	0	0	0	0	0	0	0	7.7
25	0	0	0	0	0	0	0	0	0	0	0	0	0	0	0	0	0	0	0	0	0	0	0	0	0	0	32.14	0	0	0	0	0	0	0	0	67.86	0	13.7
26	67.46	0	0	0	0	0	0	0	0	0	0	0	0	0	0	0	0	0	0	0	0	0	0	0	0	0	32.54	0	0	0	0	0	0	0	0	0	0	3.2
27	0	0	0	0	0	0	0	0	0	0	0	0	0	0	0	0	0	0	0	0	0	0	0	0	0	0	32.69	0	0	0	67.31	0	0	0	0	0	0	14.7
28	66.62	0	0	0	0	0	0	0	0	0	0	0	0	0	0	0	0	0	0	0	0	0	0	0	0	0	33.38	0	0	0	0	0	0	0	0	0	0	2.2
29	0	0	0	0	0	0	0	0	0	0	0	0	0	0	0	0	0	0	0	0	0	0	0	0	0	0	34.22	65.78	0	0	0	0	0	0	0	0	0	7.6
30	0	0	0	0	0	0	0	0	0	0	0	0	0	0	0	0	0	0	0	0	0	0	0	0	0	0	35	65	0	0	0	0	0	0	0	0	0	7.2
31	0	0	0	0	0	0	0	0	0	0	0	0	0	0	0	0	0	0	0	0	0	0	0	0	0	0	36.67	0	0	0	63.33	0	0	0	0	0	0	13.3
32	0	0	0	0	0	0	0	0	0	0	0	0	0	0	0	0	0	0	0	0	0	0	0	0	0	0	36.77	63.23	0	0	0	0	0	0	0	0	0	7.9
33	0	0	0	0	0	0	0	0	0	0	0	0	0	0	0	0	0	0	0	0	0	0	0	0	0	0	37.47	0	0	0	62.53	0	0	0	0	0	0	13.7
34	0	0	0	0	0	0	0	0	0	0	0	0	0	0	0	0	0	0	0	0	0	0	0	0	0	0	39.93	60.07	0	0	0	0	0	0	0	0	0	8.6
35	0	0	0	0	0	0	0	0	0	0	0	0	0	0	0	0	0	0	0	0	0	0	0	0	0	0	39.98	60.02	0	0	0	0	0	0	0	0	0	7.4
36	0	0	0	0	0	0	0	0	0	0	0	0	0	0	0	0	0	0	0	0	0	0	0	0	0	0	40.66	0	0	0	59.34	0	0	0	0	0	0	12
37	0	0	0	0	0	0	0	0	0	0	0	0	0	0	0	0	0	0	0	0	0	0	0	0	0	0	40.96	0	0	0	59.04	0	0	0	0	0	0	12.2
38	0	0	0	0	0	0	0	0	0	0	0	0	0	0	0	0	0	0	0	0	0	0	0	0	0	0	41.58	58.42	0	0	0	0	0	0	0	0	0	6.5
39	0	0	0	0	0	0	0	0	0	0	0	0	0	0	0	0	0	0	0	0	0	0	0	0	0	0	42.06	0	0	0	57.94	0	0	0	0	0	0	7.5
40	0	0	0	0	0	0	0	0	0	0	0	0	0	0	0	0	0	0	0	0	0	0	0	0	0	0	43.66	0	0	0	56.34	0	0	0	0	0	0	9.4
41	0	0	0	0	0	0	0	0	0	0	0	0	0	0	0	0	0	0	0	0	0	0	0	0	0	0	43.83	56.17	0	0	0	0	0	0	0	0	0	8.42
42	0	0	0	0	0	0	0	0	0	0	0	0	0	0	0	0	0	0	0	0	0	0	0	0	0	0	44.85	0	0	0	55.15	0	0	0	0	0	0	7.2
43	54.52	0	0	0	0	0	0	0	0	0	0	0	0	0	0	0	0	0	0	0	0	0	0	0	0	0	45.48	0	0	0	0	0	0	0	0	0	0	3.2
44	0	0	0	0	0	0	0	0	0	0	0	0	0	0	0	0	0	0	0	0	0	0	0	0	0	0	45.65	0	0	0	54.35	0	0	0	0	0	0	7.8
45	0	0	0	0	0	0	0	0	0	0	0	0	0	0	0	0	0	0	0	0	0	0	0	0	0	0	46.65	0	0	0	53.35	0	0	0	0	0	0	7.3
46	52.88	0	0	0	0	0	0	0	0	0	0	0	0	0	0	0	0	0	0	0	0	0	0	0	0	0	47.12	0	0	0	0	0	0	0	0	0	0	4.7
47	0	0	0	0	0	0	0	0	0	0	0	0	0	0	0	0	0	0	0	0	0	0	0	0	0	0	47.91	52.09	0	0	0	0	0	0	0	0	0	8
48	0	0	0	0	0	0	0	0	0	0	0	0	0	0	0	0	0	0	0	0	0	0	0	0	0	0	48.82	51.18	0	0	0	0	0	0	0	0	0	6.4
49	0	0	0	0	0	0	0	0	0	0	0	0	0	0	0	0	0	0	0	0	0	0	0	0	0	0	49.45	0	0	0	50.55	0	0	0	0	0	0	8
50	0	0	0	0	0	0	0	0	0	0	0	0	0	0	0	0	0	0	0	0	0	0	0	0	0	0	49.65	0	0	0	50.35	0	0	0	0	0	0	8.1
51	49.69	0	0	0	0	0	0	0	0	0	0	0	0	0	0	0	0	0	0	0	0	0	0	0	0	0	50.31	0	0	0	0	0	0	0	0	0	0	4.91
52	0	0	0	0	0	0	0	0	0	0	0	0	0	0	0	0	0	0	0	0	0	0	0	0	0	0	52.45	0	0	0	47.55	0	0	0	0	0	0	9.3
53	0	0	0	0	0	0	0	0	0	0	0	0	0	0	0	0	0	0	0	0	0	0	0	0	0	0	53.45	0	0	0	46.55	0	0	0	0	0	0	7.3
54	45.85	0	0	0	0	0	0	0	0	0	0	0	0	0	0	0	0	0	0	0	0	0	0	0	0	0	54.15	0	0	0	0	0	0	0	0	0	0	4.9
55	44.36	0	0	0	0	0	0	0	0	0	0	0	0	0	0	0	0	0	0	0	0	0	0	0	0	0	55.64	0	0	0	0	0	0	0	0	0	0	5.73
56	0	0	0	0	0	0	0	0	0	0	0	0	0	0	0	0	0	0	0	0	0	0	0	0	0	0	59.66	0	0	0	40.34	0	0	0	0	0	0	11.4667
57	0	0	0	0	0	0	0	0	0	0	0	0	0	0	0	0	0	0	0	0	0	0	0	0	0	0	62.17	0	0	0	37.83	0	0	0	0	0	0	12.3
58	0	0	0	0	0	0	0	0	0	0	0	0	0	0	0	0	0	0	0	0	0	0	0	0	0	0	62.67	0	0	0	37.33	0	0	0	0	0	0	12.4
59	37.05	0	0	0	0	0	0	0	0	0	0	0	0	0	0	0	0	0	0	0	0	0	0	0	0	0	62.95	0	0	0	0	0	0	0	0	0	0	5.4
60	0	0	0	0	0	0	0	0	0	0	0	0	0	0	0	0	0	0	0	0	0	0	0	0	0	0	64.55	35.45	0	0	0	0	0	0	0	0	0	9.2
61	33.38	0	0	0	0	0	0	0	0	0	0	0	0	0	0	0	0	0	0	0	0	0	0	0	0	0	66.62	0	0	0	0	0	0	0	0	0	0	4.6
62	0	0	0	0	0	0	0	0	0	0	0	0	0	0	0	0	0	0	0	0	0	0	0	0	0	0	66.69	0	0	0	33.31	0	0	0	0	0	0	13.1667
63	0	0	0	0	0	0	0	0	0	0	0	0	0	0	0	0	0	0	0	0	0	0	0	0	0	0	70.07	29.93	0	0	0	0	0	0	0	0	0	5.8
64	0	0	0	0	0	0	0	0	0	0	0	0	0	0	0	0	0	0	0	0	0	0	0	0	0	0	76.25	0	0	0	23.75	0	0	0	0	0	0	13.9
65	0	0	0	0	0	0	0	0	0	0	0	0	0	0	0	0	0	0	0	0	0	0	0	0	0	10	20	70	0	0	0	0	0	0	0	0	0	9.2
66	0	0	0	0	0	0	0	0	0	0	0	0	0	0	0	0	0	0	0	0	0	0	0	0	0	10.53	27.26	62.21	0	0	0	0	0	0	0	0	0	8.5
67	0	0	0	0	0	0	0	0	0	0	0	0	0	0	0	0	0	0	0	0	0	0	0	0	0	15	20	65	0	0	0	0	0	0	0	0	0	9.1
68	0	0	0	0	0	0	0	0	0	0	0	0	0	0	0	0	0	0	0	0	0	0	0	0	0	18	25	57	0	0	0	0	0	0	0	0	0	9.8
69	0	0	0	0	0	0	0	0	0	0	0	0	0	0	0	0	0	0	0	0	0	0	0	0	0	21.75	16.82	61.43	0	0	0	0	0	0	0	0	0	10
70	0	0	0	0	0	0	0	0	0	0	0	0	0	0	0	0	0	0	0	0	0	0	0	0	0	33.59	5.81	60.6	0	0	0	0	0	0	0	0	0	11.7
71	0	0	0	0	0	0	0	0	0	0	0	0	0	0	0	0	0	0	0	0	0	0	0	0	0	38.74	61.26	0	0	0	0	0	0	0	0	0	0	12.6
72	0	0	0	0	0	0	0	0	0	0	0	0	0	0	0	0	0	0	0	0	0	0	0	0	0	43.46	56.54	0	0	0	0	0	0	0	0	0	0	12.4
73	0	0	0	0	0	0	0	0	0	0	0	0	0	0	0	0	0	0	0	0	0	0	0	0	0	48.52	51.48	0	0	0	0	0	0	0	0	0	0	12.4
74	0	0	0	0	0	0	0	0	0	0	0	0	0	0	0	0	0	0	0	0	0	0	0	0	0	53.43	46.57	0	0	0	0	0	0	0	0	0	0	12.3
75	0	0	0	0	0	0	0	0	0	0	0	0	0	0	0	0	0	0	0	0	0	0	0	0	0	55.85	44.15	0	0	0	0	0	0	0	0	0	0	12.6
76	0	0	0	0	0	0	0	0	0	0	0	0	0	0	0	0	0	0	0	0	0	0	0	0	0	56	0	37	7	0	0	0	0	0	0	0	0	14
77	0	0	0	0	0	0	0	0	0	0	0	0	0	0	0	0	0	0	0	0	0	0	0	0	0	58.57	41.43	0	0	0	0	0	0	0	0	0	0	12.2
78	0	0	0	0	0	0	0	0	0	0	0	0	0	0	0	0	0	0	0	0	0	0	0	0	0	60.58	39.42	0	0	0	0	0	0	0	0	0	0	12.4
79	0	0	0	0	0	0	0	0	0	0	0	0	0	0	0	0	0	0	0	0	0	0	0	0	0	61.63	0	0	0	0	0	38.37	0	0	0	0	0	12.9
80	0	0	0	0	0	0	0	0	0	0	0	0	0	0	0	0	0	0	0	0	0	0	0	0	0	62	38	0	0	0	0	0	0	0	0	0	0	11.9
81	0	0	0	0	0	0	0	0	0	0	0	0	0	0	0	0	0	0	0	0	0	0	0	0	0	62.45	0	0	0	0	37.55	0	0	0	0	0	0	16.9
82	0	0	0	0	0	0	0	0	0	0	0	0	0	0	0	0	0	0	0	0	0	0	0	0	0	65.34	34.66	0	0	0	0	0	0	0	0	0	0	12.4
83	0	0	0	0	0	0	0	0	0	0	0	0	0	0	0	0	0	0	0	0	0	0	0	0	0	65.51	0	0	0	0	0	34.49	0	0	0	0	0	13.8
84	0	0	0	0	0	0	0	0	0	0	0	0	0	0	0	0	0	0	0	0	0	0	0	0	0	66.21	0	0	0	0	0	33.79	0	0	0	0	0	13.9
85	0	0	0	0	0	0	0	0	0	0	0	0	0	0	0	0	0	0	0	0	0	0	0	0	0	67.31	0	0	0	0	32.69	0	0	0	0	0	0	17
86	0	0	0	0	0	0	0	0	0	0	0	0	0	0	0	0	0	0	0	0	0	0	0	0	0	67.37	0	0	0	0	0	32.63	0	0	0	0	0	14.2
87	0	0	0	0	0	0	0	0	0	0	0	0	0	0	0	0	0	0	0	0	0	0	0	0	0	68.95	0	0	0	0	31.05	0	0	0	0	0	0	16.5
88	0	0	0	0	0	0	0	0	0	0	0	0	0	0	0	0	0	0	0	0	0	0	0	0	0	69.74	0	0	0	0	0	30.26	0	0	0	0	0	14.1
89	0	0	0	0	0	0	0	0	0	0	0	0	0	0	0	0	0	0	0	0	0	0	0	0	0	70.6	0	0	29.4	0	0	0	0	0	0	0	0	11
90	0	0	0	0	0	0	0	0	0	0	0	0	0	0	0	0	0	0	0	0	0	0	0	0	0	71.55	28.45	0	0	0	0	0	0	0	0	0	0	12.8
91	0	0	0	0	0	0	0	0	0	0	0	0	0	0	0	0	0	0	0	0	0	0	0	0	0	72.12	0	0	0	0	27.88	0	0	0	0	0	0	17
92	0	0	0	0	0	0	0	0	0	0	0	0	0	0	0	0	0	0	0	0	0	0	0	0	0	72.14	0	0	0	0	0	27.86	0	0	0	0	0	14.7
93	0	0	0	0	0	0	0	0	0	0	0	0	0	0	0	0	0	0	0	0	0	0	0	0	0	73.36	0	0	0	0	0	26.64	0	0	0	0	0	14.3333
94	0	0	0	0	0	0	0	0	0	0	0	0	0	0	0	0	0	0	0	0	0	0	0	0	0	74.29	0	0	0	25.71	0	0	0	0	0	0	0	12.33
95	0	0	0	0	0	0	0	0	0	0	0	0	0	0	0	0	0	0	0	0	0	0	0	0	0	75.15	24.85	0	0	0	0	0	0	0	0	0	0	13.5
96	0	0	0	0	0	0	0	0	0	0	0	0	0	0	0	0	0	0	0	0	0	0	0	0	0	75.57	0	0	0	0	0	24.43	0	0	0	0	0	14.8
97	0	0	0	0	0	0	0	0	0	0	0	0	0	0	0	0	0	0	0	0	0	0	0	0	0	76.19	23.81	0	0	0	0	0	0	0	0	0	0	13.38
98	0	0	0	0	0	0	0	0	0	0	0	0	0	0	0	0	0	0	0	0	0	0	0	0	0	76.57	0	0	0	0	0	23.43	0	0	0	0	0	14.6
99	0	0	0	0	0	0	0	0	0	0	0	0	0	0	0	0	0	0	0	0	0	0	0	0	0	76.89	0	0	0	0	23.11	0	0	0	0	0	0	17

## Sheet: Young's modulus
Glass ID	INPUT FEATURES																																					OUTPUT
	SiO2	B2O3	Al2O3	MgO	CaO	BaO	Li2O	Na2O	K2O	Ag2O	Cs2O	Tl2O	BeO	NiO	CuO	ZnO	CdO	PbO	Ga2O3	Y2O3	La2O3	Gd2O3	Bi2O3	TiO2	ZrO2	TeO2	P2O5	V2O5	Nb2O5	Ta2O5	MoO3	WO3	H2O	Sm2O3	MgF2	PbF2	PbCl2	Young's modulus (GPa)
1	0	0	0	0	0	0	0	0	0	0	0	0	0	0	0	0	0	0	0	0	0	0	0	0	0	0	10.03	89.97	0	0	0	0	0	0	0	0	0	41.5
2	0	0	0	0	0	0	0	0	0	0	0	0	0	0	0	0	0	0	0	0	0	0	0	0	0	0	10.22	89.78	0	0	0	0	0	0	0	0	0	41.5
3	0	0	0	0	0	0	0	0	0	0	0	0	0	0	0	0	0	0	0	0	0	0	0	0	0	0	13.41	0	0	0	1.74	84.84	0	0	0	0	0	79.2
4	0	0	0	0	0	0	0	0	0	0	0	0	0	0	0	0	0	0	0	0	0	0	0	0	0	0	14.62	0	0	0	85.38	0	0	0	0	0	0	51.9
5	0	0	0	0	0	0	0	0	0	0	0	0	0	0	0	0	0	0	0	0	0	0	0	0	0	0	16.32	83.67	0	0	0	0	0	0	0	0	0	43.4333
6	0	0	0	0	0	0	0	0	0	0	0	0	0	0	0	0	0	0	0	0	0	0	0	0	0	0	18.78	0	0	0	81.21	0	0	0	0	0	0	50.4
7	0	0	0	0	0	0	0	0	0	0	0	0	0	0	0	0	0	0	0	0	0	0	0	0	0	0	18.79	0	0	0	81.21	0	0	0	0	0	0	50.4
8	0	0	0	0	0	0	0	0	0	0	0	0	0	0	0	0	0	0	0	0	0	0	0	0	0	0	20.86	1.34	0	0	0	77.8	0	0	0	0	0	77.2
9	0	0	0	0	0	0	0	0	0	0	0	0	0	0	0	0	0	0	0	0	0	0	0	0	0	0	23.17	0	0	0	0	76.83	0	0	0	0	0	78.3
10	0	0	0	0	0	0	0	0	0	0	0	0	0	0	0	0	0	0	0	0	0	0	0	0	0	0	23.75	0	0	0	76.25	0	0	0	0	0	0	48.9
11	0	0	0	0	0	0	0	0	0	0	0	0	0	0	0	0	0	0	0	0	0	0	0	0	0	0	24.74	0	0	0	75.26	0	0	0	0	0	0	49.2
12	0	0	0	0	0	0	0	0	0	0	0	0	0	0	0	0	0	0	0	0	0	0	0	0	0	0	26.73	0	0	0	73.27	0	0	0	0	0	0	46.8
13	0	0	0	0	0	0	0	0	0	0	0	0	0	0	0	0	0	0	0	0	0	0	0	0	0	0	29.91	0	0	0	70.09	0	0	0	0	0	0	53.7
14	0	0	0	0	0	0	0	0	0	0	0	0	0	0	0	0	0	0	0	0	0	0	0	0	0	0	30.2	0	0	0	69.8	0	0	0	0	0	0	46.5
15	0	0	0	0	0	0	0	0	0	0	0	0	0	0	0	0	0	0	0	0	0	0	0	0	0	0	33.88	0	0	0	66.11	0	0	0	0	0	0	44.75
16	0	0	0	0	0	0	0	0	0	0	0	0	0	0	0	0	0	0	0	0	0	0	0	0	0	0	33.89	0	0	0	66.11	0	0	0	0	0	0	44.8
17	0	0	0	0	0	0	0	0	0	0	0	0	0	0	0	0	0	0	0	0	0	0	0	0	0	0	34.08	0	0	0	65.91	0	0	0	0	0	0	45.2
18	0	0	0	0	0	0	0	0	0	0	0	0	0	0	0	0	0	0	0	0	0	0	0	0	0	0	34.08	0	0	0	65.92	0	0	0	0	0	0	45.2
19	0	0	0	0	0	0	0	0	0	0	0	0	0	0	0	0	0	0	0	0	0	0	0	0	0	0	34.48	0	0	0	65.52	0	0	0	0	0	0	57
20	0	0	0	0	0	0	0	0	0	0	0	0	0	0	0	0	0	0	0	0	0	0	0	0	0	0	35.68	0	0	0	64.32	0	0	0	0	0	0	44.3
21	0	0	0	0	0	0	0	0	0	0	0	0	0	0	0	0	0	0	0	0	0	0	0	0	0	0	36.67	0	0	0	63.32	0	0	0	0	0	0	45.1
22	0	0	0	0	0	0	0	0	0	0	0	0	0	0	0	0	0	0	0	0	0	0	0	0	0	0	36.67	0	0	0	63.33	0	0	0	0	0	0	44.7
23	0	0	0	0	0	0	0	0	0	0	0	0	0	0	0	0	0	0	0	0	0	0	0	0	0	0	39.66	0	0	0	60.34	0	0	0	0	0	0	40.5
24	0	0	0	0	0	0	0	0	0	0	0	0	0	0	0	0	0	0	0	0	0	0	0	0	0	0	42.06	0	0	0	57.94	0	0	0	0	0	0	56.3
25	0	0	0	0	0	0	0	0	0	0	0	0	0	0	0	0	0	0	0	0	0	0	0	0	0	0	44.05	0	0	0	55.94	0	0	0	0	0	0	48.2
26	0	0	0	0	0	0	0	0	0	0	0	0	0	0	0	0	0	0	0	0	0	0	0	0	0	0	44.05	0	0	0	55.95	0	0	0	0	0	0	48.2
27	0	0	0	0	0	0	0	0	0	0	0	0	0	0	0	0	0	0	0	0	0	0	0	0	0	0	44.25	0	0	0	55.74	0	0	0	0	0	0	48.9
28	0	0	0	0	0	0	0	0	0	0	0	0	0	0	0	0	0	0	0	0	0	0	0	0	0	0	44.25	0	0	0	55.75	0	0	0	0	0	0	48.9
29	0	0	0	0	0	0	0	0	0	0	0	0	0	0	0	0	0	0	0	0	0	0	0	0	0	0	44.45	0	0	0	55.54	0	0	0	0	0	0	47.9
30	0	0	0	0	0	0	0	0	0	0	0	0	0	0	0	0	0	0	0	0	0	0	0	0	0	0	44.45	0	0	0	55.55	0	0	0	0	0	0	47.9
31	0	0	0	0	0	0	0	0	0	0	0	0	0	0	0	0	0	0	0	0	0	0	0	0	0	0	44.85	0	0	0	55.15	0	0	0	0	0	0	61.5
32	0	0	0	0	0	0	0	0	0	0	0	0	0	0	0	0	0	0	0	0	0	0	0	0	0	0	46.65	0	0	0	53.35	0	0	0	0	0	0	51.4
33	0	0	0	0	0	0	0	0	0	0	0	0	0	0	0	0	0	0	0	0	0	0	0	0	0	0	50.15	0	0	0	49.85	0	0	0	0	0	0	57.2
34	0	0	0	0	0	0	0	0	0	0	0	0	0	0	0	0	0	0	0	0	0	0	0	0	0	0	51.65	0	0	0	48.35	0	0	0	0	0	0	49.3
35	0	0	0	0	0	0	0	0	0	0	0	0	0	0	0	0	0	0	0	0	0	0	0	0	0	0	52.65	0	0	0	47.35	0	0	0	0	0	0	45.8
36	0	0	0	0	0	0	0	0	0	0	0	0	0	0	0	0	0	0	0	0	0	0	0	0	0	0	55.45	0	0	0	44.54	0	0	0	0	0	0	47.3
37	0	0	0	0	0	0	0	0	0	0	0	0	0	0	0	0	0	0	0	0	0	0	0	0	0	0	55.45	0	0	0	44.55	0	0	0	0	0	0	47.3
38	0	0	0	0	0	0	0	0	0	0	0	0	0	0	0	0	0	0	0	0	0	0	0	0	0	0	58.51	0	0	0	0	0	0	41.49	0	0	0	57.8
39	0	0	0	0	0	0	0	0	0	0	0	0	0	0	0	0	0	0	0	0	0	0	0	0	0	0	59.46	0	0	0	40.54	0	0	0	0	0	0	51.9
40	0	0	0	0	0	0	0	0	0	0	0	0	0	0	0	0	0	0	0	0	0	0	0	0	0	0	59.66	0	0	0	40.34	0	0	0	0	0	0	44.9
41	0	0	0	0	0	0	0	0	0	0	0	0	0	0	0	0	0	0	0	0	0	0	0	0	0	0	60.21	0	0	0	0	0	0	39.79	0	0	0	57.7
42	0	0	0	0	0	0	0	0	0	0	0	0	0	0	0	0	0	0	0	0	0	0	0	0	0	0	62.67	0	0	0	37.33	0	0	0	0	0	0	41.3
43	0	0	0	0	0	0	0	0	0	0	0	0	0	0	0	0	0	0	0	0	0	0	0	0	0	0	63.68	0	0	0	36.32	0	0	0	0	0	0	40.7
44	0	0	0	0	0	0	0	0	0	0	0	0	0	0	0	0	0	0	0	0	0	0	0	0	0	0	64.68	0	0	0	35.32	0	0	0	0	0	0	40.4
45	0	0	0	0	0	0	0	0	0	0	0	0	0	0	0	0	0	0	0	0	0	0	0	0	0	0	70.51	0	0	0	29.49	0	0	0	0	0	0	39.6
46	0	0	0	0	0	0	0	0	0	0	0	0	0	0	0	0	0	0	0	0	0	0	0	0	0	0	81.59	0	0	0	18.41	0	0	0	0	0	0	35.7
47	0	0	0	0	0	0	0	0	0	0	0	0	0	0	0	0	0	0	0	0	0	0	0	0	0	0	88.89	0	0	0	0	0	11.11	0	0	0	0	16.1667
48	0	0	0	0	0	0	0	0	0	0	0	0	0	0	0	0	0	0	0	0	0	0	0	0	0	0	90.93	0	0	0	0	0	9.07	0	0	0	0	18.0333
49	0	0	0	0	0	0	0	0	0	0	0	0	0	0	0	0	0	0	0	0	0	0	0	0	0	0	92.26	0	0	0	0	0	7.74	0	0	0	0	19.7667
50	0	0	0	0	0	0	0	0	0	0	0	0	0	0	0	0	0	0	0	0	0	0	0	0	0	0	92.84	0	0	0	0	0	7.16	0	0	0	0	20.25
51	0	0	0	0	0	0	0	0	0	0	0	0	0	0	0	0	0	0	0	0	0	0	0	0	0	0	94.48	0	0	0	0	0	5.52	0	0	0	0	22
52	0	0	0	0	0	0	0	0	0	0	0	0	0	0	0	0	0	0	0	0	0	0	0	0	0	0	97.53	0	0	0	0	0	2.46	0	0	0	0	24.46
53	0	0	0	0	0	0	0	0	0	0	0	0	0	0	0	0	0	0	0	0	0	0	0	0	0	0	98.33	0	0	0	0	0	1.67	0	0	0	0	25.7
54	0	0	0	0	0	0	0	0	0	0	0	0	0	0	0	0	0	0	0	0	0	0	0	0	0	0	99.5	0	0	0	0	0	0.5	0	0	0	0	27.7
55	0	0	0	0	0	0	0	0	0	0	0	0	0	0	0	0	0	0	0	0	0	0	0	0	0	0	99.85	0	0	0	0	0	0.15	0	0	0	0	28.9
56	0	0	0	0	0	0	0	0	0	0	0	0	0	0	0	0	0	0	0	0	0	0	0	0	0	49.74	0	50.26	0	0	0	0	0	0	0	0	0	43
57	0	0	0	0	0	0	0	0	0	0	0	0	0	0	0	0	0	0	0	0	0	0	0	0	0	50	0	50	0	0	0	0	0	0	0	0	0	44.2
58	0	0	0	0	0	0	0	0	0	0	0	0	0	0	0	0	0	0	0	0	0	0	0	0	0	51.75	0	48.25	0	0	0	0	0	0	0	0	0	30
59	0	0	0	0	0	0	0	0	0	0	0	0	0	0	0	0	0	0	0	0	0	0	0	0	0	52.2	0	47.8	0	0	0	0	0	0	0	0	0	36.7
60	0	0	0	0	0	0	0	0	0	0	0	0	0	0	0	0	0	0	0	0	0	0	0	0	0	58.09	0	0	0	0	41.91	0	0	0	0	0	0	38.7
61	0	0	0	0	0	0	0	0	0	0	0	0	0	0	0	0	0	0	0	0	0	0	0	0	0	67.41	0	0	32.59	0	0	0	0	0	0	0	0	39.18
62	0	0	0	0	0	0	0	0	0	0	0	0	0	0	0	0	0	0	0	0	0	0	0	0	0	68.38	0	0	0	0	0	25.8	0	5.82	0	0	0	63.7
63	0	0	0	0	0	0	0	0	0	0	0	0	0	0	0	0	0	0	0	0	0	0	0	0	0	70.6	0	0	29.4	0	0	0	0	0	0	0	0	38.04
64	0	0	0	0	0	0	0	0	0	0	0	0	0	0	0	0	0	0	0	0	0	0	0	0	0	71.91	0	0	0	0	0	26.11	0	0	0	0	0	54
65	0	0	0	0	0	0	0	0	0	0	0	0	0	0	0	0	0	0	0	0	0	0	0	0	0	73.89	0	0	26.11	0	0	0	0	0	0	0	0	33.71
66	0	0	0	0	0	0	0	0	0	0	0	0	0	0	0	0	0	0	0	0	0	0	0	0	0	77.28	0	0	22.72	0	0	0	0	0	0	0	0	29.77
67	0	0	0	0	0	0	0	0	0	0	0	0	0	0	0	0	0	0	0	0	0	0	0	0	0	80.78	0	0	19.22	0	0	0	0	0	0	0	0	26.98
68	0	0	0	0	0	0	0	0	0	0	0	0	0	0	0	0	0	0	0	0	0	0	0	0	0	88.1	0	0	11.9	0	0	0	0	0	0	0	0	22.27
69	0	0	0	0	0	0	0	0	0	0	0	0	0	0	0	0	0	0	0	0	0	0	0	0	0	88.76	0	11.24	0	0	0	0	0	0	0	0	0	37.5
70	0	0	0	0	0	0	0	0	0	0	0	0	0	0	0	0	0	0	0	0	0	0	0	0	0	93.51	0	0	6.49	0	0	0	0	0	0	0	0	20.1
71	0	0	0	0	0	0	0	0	0	0	0	0	0	0	0	0	0	0	0	0	0	0	0	0	3.5	63.54	0	0	0	0	0	32.96	0	0	0	0	0	46.8
72	0	0	0	0	0	0	0	0	0	0	0	0	0	0	0	0	0	0	0	0	0	0	0	0	3.58	69.5	0	0	0	0	0	26.92	0	0	0	0	0	39.5
73	0	0	0	0	0	0	0	0	0	0	0	0	0	0	0	0	0	0	0	0	0	0	0	0	3.62	72.57	0	0	0	0	0	23.81	0	0	0	0	0	38.4
74	0	0	0	0	0	0	0	0	0	0	0	0	0	0	0	0	0	0	0	0	0	0	0	0	3.65	75.73	0	0	0	0	0	20.62	0	0	0	0	0	37.3
75	0	0	0	0	0	0	0	0	0	0	0	0	0	0	0	0	0	0	0	0	0	0	0	0.95	0	47.3	0	51.75	0	0	0	0	0	0	0	0	0	47.03
76	0	0	0	0	0	0	0	0	0	0	0	0	0	0	0	0	0	0	0	0	0	0	0	2.41	0	48.18	0	49.41	0	0	0	0	0	0	0	0	0	48.34
77	0	0	0	0	0	0	0	0	0	0	0	0	0	0	0	0	0	0	0	0	0	0	0	4.79	0	0	24.41	70.8	0	0	0	0	0	0	0	0	0	55.6
78	0	0	0	0	0	0	0	0	0	0	0	0	0	0	0	0	0	0	0	0	0	0	0	4.97	0	0	24.29	70.74	0	0	0	0	0	0	0	0	0	55.6
79	0	0	0	0	0	0	0	0	0	0	0	0	0	0	0	0	0	0	0	0	0	0	0	4.98	0	49.7	0	45.32	0	0	0	0	0	0	0	0	0	50.42
80	0	0	0	0	0	0	0	0	0	0	0	0	0	0	0	0	0	0	0	0	0	0	0	5.27	0	94.73	0	0	0	0	0	0	0	0	0	0	0	49
81	0	0	0	0	0	0	0	0	0	0	0	0	0	0	0	0	0	0	0	0	0	0	0	6.32	0	50.51	0	43.17	0	0	0	0	0	0	0	0	0	52.72
82	0	0	0	0	0	0	0	0	0	0	0	0	0	0	0	0	0	0	0	0	0	0	0	7.71	0	51.34	0	40.95	0	0	0	0	0	0	0	0	0	54.55
83	0	0	0	0	0	0	0	0	0	0	0	0	0	0	0	0	0	0	0	0	0	0	5	0	0	50	0	45	0	0	0	0	0	0	0	0	0	46.7
84	0	0	0	0	0	0	0	0	0	0	0	0	0	0	0	0	0	0	0	0	0	0	5.32	0	0	50.07	0	44.61	0	0	0	0	0	0	0	0	0	46.48
85	0	0	0	0	0	0	0	0	0	0	0	0	0	0	0	0	0	0	0	0	0	0	10	0	0	50	0	40	0	0	0	0	0	0	0	0	0	48.1
86	0	0	0	0	0	0	0	0	0	0	0	0	0	0	0	0	0	0	0	0	0	0	10.31	0	0	49.44	0	40.25	0	0	0	0	0	0	0	0	0	48.14
87	0	0	0	0	0	0	0	0	0	0	0	0	0	0	0	0	0	0	0	0	0	0	15	0	0	50	0	35	0	0	0	0	0	0	0	0	0	49.3
88	0	0	0	0	0	0	0	0	0	0	0	0	0	0	0	0	0	0	0	0	0	0	15.03	0	0	49.77	0	35.2	0	0	0	0	0	0	0	0	0	49.18
89	0	0	0	0	0	0	0	0	0	0	0	0	0	0	0	0	0	0	0	0	0	0	19.49	0	0	50.08	0	30.43	0	0	0	0	0	0	0	0	0	50.41
90	0	0	0	0	0	0	0	0	0	0	0	0	0	0	0	0	0	0	0	0	0	0	20	0	0	50	0	30	0	0	0	0	0	0	0	0	0	50.5
91	0	0	0	0	0	0	0	0	0	0	0	0	0	0	0	0	0	0	0	0	0	0	25	0	0	50	0	25	0	0	0	0	0	0	0	0	0	51.4
92	0	0	0	0	0	0	0	0	0	0	0	0	0	0	0	0	0	0	0	0	0	0	25.72	0	0	49.64	0	24.64	0	0	0	0	0	0	0	0	0	51.33
93	0	0	0	0	0	0	0	0	0	0	0	0	0	0	0	0	0	0	0	0	0	0	38.03	0	0	0	61.97	0	0	0	0	0	0	0	0	0	0	51.3
94	0	0	0	0	0	0	0	0	0	0	0	0	0	0	0	0	0	0	0	0	0	0	45.11	0	0	0	54.89	0	0	0	0	0	0	0	0	0	0	52.2
95	0	0	0	0	0	0	0	0	0	0	0	0	0	0	0	0	0	0	0	0	0	0	49.35	0	0	0	50.65	0	0	0	0	0	0	0	0	0	0	52.8
96	0	0	0	0	0	0	0	0	0	0	0	0	0	0	0	0	0	0	0	0	0	0	51.58	0	0	0	48.42	0	0	0	0	0	0	0	0	0	0	52.7
97	0	0	0	0	0	0	0	0	0	0	0	0	0	0	0	0	0	0	0	0	0	0	56.11	0	0	0	43.89	0	0	0	0	0	0	0	0	0	0	50.6
98	0	0	0	0	0	0	0	0	0	0	0	0	0	0	0	0	0	0	0	0	0	0	59.03	0	0	0	40.97	0	0	0	0	0	0	0	0	0	0	51.9
99	0	0	0	0	0	0	0	0	0	0	0	0	0	0	0	0	0	0	0	0	0	0	64.15	0	0	0	35.85	0	0	0	0	0	0	0	0	0	0	53.7

## Sheet: Shear modulus
Glass ID	INPUT FEATURES																																					OUTPUT
	SiO2	B2O3	Al2O3	MgO	CaO	BaO	Li2O	Na2O	K2O	Ag2O	Cs2O	Tl2O	BeO	NiO	CuO	ZnO	CdO	PbO	Ga2O3	Y2O3	La2O3	Gd2O3	Bi2O3	TiO2	ZrO2	TeO2	P2O5	V2O5	Nb2O5	Ta2O5	MoO3	WO3	H2O	Sm2O3	MgF2	PbF2	PbCl2	Shear modulus (GPa)
1	0	0	0	0	0	0	0	0	0	0	0	0	0	0	0	0	0	0	0	0	0	0	0	0	0	0	10.03	89.97	0	0	0	0	0	0	0	0	0	16.4
2	0	0	0	0	0	0	0	0	0	0	0	0	0	0	0	0	0	0	0	0	0	0	0	0	0	0	13.27	0	0	0	0	86.73	0	0	0	0	0	35.7347
3	0	0	0	0	0	0	0	0	0	0	0	0	0	0	0	0	0	0	0	0	0	0	0	0	0	0	13.41	0	0	0	1.74	84.84	0	0	0	0	0	33.0025
4	0	0	0	0	0	0	0	0	0	0	0	0	0	0	0	0	0	0	0	0	0	0	0	0	0	0	14.43	0	0	0	85.57	0	0	0	0	0	0	21.1464
5	0	0	0	0	0	0	0	0	0	0	0	0	0	0	0	0	0	0	0	0	0	0	0	0	0	0	14.62	0	0	0	85.37	0	0	0	0	0	0	20.8893
6	0	0	0	0	0	0	0	0	0	0	0	0	0	0	0	0	0	0	0	0	0	0	0	0	0	0	14.62	0	0	0	85.38	0	0	0	0	0	0	20.8893
7	0	0	0	0	0	0	0	0	0	0	0	0	0	0	0	0	0	0	0	0	0	0	0	0	0	0	18.78	0	0	0	81.21	0	0	0	0	0	0	20.3417
8	0	0	0	0	0	0	0	0	0	0	0	0	0	0	0	0	0	0	0	0	0	0	0	0	0	0	18.79	0	0	0	81.21	0	0	0	0	0	0	20.3417
9	0	0	0	0	0	0	0	0	0	0	0	0	0	0	0	0	0	0	0	0	0	0	0	0	0	0	19.78	0	0	0	80.22	0	0	0	0	0	0	21.2049
10	0	0	0	0	0	0	0	0	0	0	0	0	0	0	0	0	0	0	0	0	0	0	0	0	0	0	20.64	79.36	0	0	0	0	0	0	0	0	0	27.3022
11	0	0	0	0	0	0	0	0	0	0	0	0	0	0	0	0	0	0	0	0	0	0	0	0	0	0	21.76	0	0	0	78.24	0	0	0	0	0	0	19.9922
12	0	0	0	0	0	0	0	0	0	0	0	0	0	0	0	0	0	0	0	0	0	0	0	0	0	0	23.05	0	0	0	76.95	0	0	0	0	0	0	19.9823
13	0	0	0	0	0	0	0	0	0	0	0	0	0	0	0	0	0	0	0	0	0	0	0	0	0	0	23.75	0	0	0	76.25	0	0	0	0	0	0	20.5293
14	0	0	0	0	0	0	0	0	0	0	0	0	0	0	0	0	0	0	0	0	0	0	0	0	0	0	24.74	0	0	0	75.26	0	0	0	0	0	0	21.8491
15	0	0	0	0	0	0	0	0	0	0	0	0	0	0	0	0	0	0	0	0	0	0	0	0	0	0	26.72	0	0	0	73.27	0	0	0	0	0	0	19.0993
16	0	0	0	0	0	0	0	0	0	0	0	0	0	0	0	0	0	0	0	0	0	0	0	0	0	0	26.73	0	0	0	73.27	0	0	0	0	0	0	19.0993
17	0	0	0	0	0	0	0	0	0	0	0	0	0	0	0	0	0	0	0	0	0	0	0	0	0	0	28.98	0	0	0	0	71.01	0	0	0	0	0	31.8
18	0	0	0	0	0	0	0	0	0	0	0	0	0	0	0	0	0	0	0	0	0	0	0	0	0	0	29.11	0	0	0	70.89	0	0	0	0	0	0	18.8394
19	0	0	0	0	0	0	0	0	0	0	0	0	0	0	0	0	0	0	0	0	0	0	0	0	0	0	29.71	0	0	0	70.29	0	0	0	0	0	0	18.9476
20	0	0	0	0	0	0	0	0	0	0	0	0	0	0	0	0	0	0	0	0	0	0	0	0	0	0	29.9	0	0	0	70.09	0	0	0	0	0	0	21.8223
21	0	0	0	0	0	0	0	0	0	0	0	0	0	0	0	0	0	0	0	0	0	0	0	0	0	0	29.91	0	0	0	70.09	0	0	0	0	0	0	21.8223
22	0	0	0	0	0	0	0	0	0	0	0	0	0	0	0	0	0	0	0	0	0	0	0	0	0	0	30.2	0	0	0	69.79	0	0	0	0	0	0	18.8388
23	0	0	0	0	0	0	0	0	0	0	0	0	0	0	0	0	0	0	0	0	0	0	0	0	0	0	30.9	0	0	0	69.1	0	0	0	0	0	0	23.3381
24	0	0	0	0	0	0	0	0	0	0	0	0	0	0	0	0	0	0	0	0	0	0	0	0	0	0	33.88	0	0	0	66.11	0	0	0	0	0	0	18.3197
25	0	0	0	0	0	0	0	0	0	0	0	0	0	0	0	0	0	0	0	0	0	0	0	0	0	0	33.89	0	0	0	66.11	0	0	0	0	0	0	18.4685
26	0	0	0	0	0	0	0	0	0	0	0	0	0	0	0	0	0	0	0	0	0	0	0	0	0	0	34.08	0	0	0	65.91	0	0	0	0	0	0	18.2363
27	0	0	0	0	0	0	0	0	0	0	0	0	0	0	0	0	0	0	0	0	0	0	0	0	0	0	34.08	0	0	0	65.92	0	0	0	0	0	0	18.2363
28	0	0	0	0	0	0	0	0	0	0	0	0	0	0	0	0	0	0	0	0	0	0	0	0	0	0	34.48	0	0	0	65.52	0	0	0	0	0	0	23.1909
29	0	0	0	0	0	0	0	0	0	0	0	0	0	0	0	0	0	0	0	0	0	0	0	0	0	0	34.58	0	0	0	65.42	0	0	0	0	0	0	18.2547
30	0	0	0	0	0	0	0	0	0	0	0	0	0	0	0	0	0	0	0	0	0	0	0	0	0	0	34.68	0	0	0	65.32	0	0	0	0	0	0	18.301
31	0	0	0	0	0	0	0	0	0	0	0	0	0	0	0	0	0	0	0	0	0	0	0	0	0	0	34.88	0	0	0	65.12	0	0	0	0	0	0	18.107
32	0	0	0	0	0	0	0	0	0	0	0	0	0	0	0	0	0	0	0	0	0	0	0	0	0	0	35.68	0	0	0	64.32	0	0	0	0	0	0	20.2824
33	0	0	0	0	0	0	0	0	0	0	0	0	0	0	0	0	0	0	0	0	0	0	0	0	0	0	36.67	0	0	0	63.32	0	0	0	0	0	0	18.2415
34	0	0	0	0	0	0	0	0	0	0	0	0	0	0	0	0	0	0	0	0	0	0	0	0	0	0	36.67	0	0	0	63.33	0	0	0	0	0	0	18.0593
35	0	0	0	0	0	0	0	0	0	0	0	0	0	0	0	0	0	0	0	0	0	0	0	0	0	0	37.37	0	0	0	62.63	0	0	0	0	0	0	17.8159
36	0	0	0	0	0	0	0	0	0	0	0	0	0	0	0	0	0	0	0	0	0	0	0	0	0	0	37.47	0	0	0	62.53	0	0	0	0	0	0	16.7503
37	0	0	0	0	0	0	0	0	0	0	0	0	0	0	0	0	0	0	0	0	0	0	0	0	0	0	39.66	0	0	0	60.34	0	0	0	0	0	0	16.4433
38	0	0	0	0	0	0	0	0	0	0	0	0	0	0	0	0	0	0	0	0	0	0	0	0	0	0	40.96	0	0	0	59.04	0	0	0	0	0	0	19.4633
39	0	0	0	0	0	0	0	0	0	0	0	0	0	0	0	0	0	0	0	0	0	0	0	0	0	0	42.06	0	0	0	57.94	0	0	0	0	0	0	23.1022
40	0	0	0	0	0	0	0	0	0	0	0	0	0	0	0	0	0	0	0	0	0	0	0	0	0	0	44.05	0	0	0	55.94	0	0	0	0	0	0	19.8123
41	0	0	0	0	0	0	0	0	0	0	0	0	0	0	0	0	0	0	0	0	0	0	0	0	0	0	44.05	0	0	0	55.95	0	0	0	0	0	0	19.8123
42	0	0	0	0	0	0	0	0	0	0	0	0	0	0	0	0	0	0	0	0	0	0	0	0	0	0	44.25	0	0	0	55.74	0	0	0	0	0	0	19.8604
43	0	0	0	0	0	0	0	0	0	0	0	0	0	0	0	0	0	0	0	0	0	0	0	0	0	0	44.25	0	0	0	55.75	0	0	0	0	0	0	19.8604
44	0	0	0	0	0	0	0	0	0	0	0	0	0	0	0	0	0	0	0	0	0	0	0	0	0	0	44.45	0	0	0	55.54	0	0	0	0	0	0	19.6728
45	0	0	0	0	0	0	0	0	0	0	0	0	0	0	0	0	0	0	0	0	0	0	0	0	0	0	44.45	0	0	0	55.55	0	0	0	0	0	0	19.6728
46	0	0	0	0	0	0	0	0	0	0	0	0	0	0	0	0	0	0	0	0	0	0	0	0	0	0	44.85	0	0	0	55.15	0	0	0	0	0	0	25.4874
47	0	0	0	0	0	0	0	0	0	0	0	0	0	0	0	0	0	0	0	0	0	0	0	0	0	0	45.65	0	0	0	54.35	0	0	0	0	0	0	20.789
48	0	0	0	0	0	0	0	0	0	0	0	0	0	0	0	0	0	0	0	0	0	0	0	0	0	0	49.45	0	0	0	50.55	0	0	0	0	0	0	21.1654
49	0	0	0	0	0	0	0	0	0	0	0	0	0	0	0	0	0	0	0	0	0	0	0	0	0	0	49.85	0	0	0	50.15	0	0	0	0	0	0	23.901
50	0	0	0	0	0	0	0	0	0	0	0	0	0	0	0	0	0	0	0	0	0	0	0	0	0	0	49.95	0	0	0	50.05	0	0	0	0	0	0	20.995
51	0	0	0	0	0	0	0	0	0	0	0	0	0	0	0	0	0	0	0	0	0	0	0	0	0	0	50.15	0	0	0	49.85	0	0	0	0	0	0	23.6673
52	0	0	0	0	0	0	0	0	0	0	0	0	0	0	0	0	0	0	0	0	0	0	0	0	0	0	50.95	0	0	0	49.05	0	0	0	0	0	0	20.4778
53	0	0	0	0	0	0	0	0	0	0	0	0	0	0	0	0	0	0	0	0	0	0	0	0	0	0	51.65	0	0	0	48.35	0	0	0	0	0	0	20.2839
54	0	0	0	0	0	0	0	0	0	0	0	0	0	0	0	0	0	0	0	0	0	0	0	0	0	0	52.45	0	0	0	47.55	0	0	0	0	0	0	20.0216
55	0	0	0	0	0	0	0	0	0	0	0	0	0	0	0	0	0	0	0	0	0	0	0	0	0	0	52.65	0	0	0	47.35	0	0	0	0	0	0	19.2963
56	0	0	0	0	0	0	0	0	0	0	0	0	0	0	0	0	0	0	0	0	0	0	0	0	0	0	52.85	0	0	0	47.15	0	0	0	0	0	0	19.8444
57	0	0	0	0	0	0	0	0	0	0	0	0	0	0	0	0	0	0	0	0	0	0	0	0	0	0	53.45	0	0	0	46.55	0	0	0	0	0	0	23.0516
58	0	0	0	0	0	0	0	0	0	0	0	0	0	0	0	0	0	0	0	0	0	0	0	0	0	0	55.45	0	0	0	44.54	0	0	0	0	0	0	19.3634
59	0	0	0	0	0	0	0	0	0	0	0	0	0	0	0	0	0	0	0	0	0	0	0	0	0	0	58.51	0	0	0	0	0	0	41.49	0	0	0	23.6088
60	0	0	0	0	0	0	0	0	0	0	0	0	0	0	0	0	0	0	0	0	0	0	0	0	0	0	59.46	0	0	0	40.54	0	0	0	0	0	0	21.1469
61	0	0	0	0	0	0	0	0	0	0	0	0	0	0	0	0	0	0	0	0	0	0	0	0	0	0	59.66	0	0	0	40.34	0	0	0	0	0	0	16.5895
62	0	0	0	0	0	0	0	0	0	0	0	0	0	0	0	0	0	0	0	0	0	0	0	0	0	0	60.21	0	0	0	0	0	0	39.79	0	0	0	23.6415
63	0	0	0	0	0	0	0	0	0	0	0	0	0	0	0	0	0	0	0	0	0	0	0	0	0	0	61.95	0	0	0	0	0	0	38.05	0	0	0	23.3176
64	0	0	0	0	0	0	0	0	0	0	0	0	0	0	0	0	0	0	0	0	0	0	0	0	0	0	62.67	0	0	0	37.33	0	0	0	0	0	0	16.943
65	0	0	0	0	0	0	0	0	0	0	0	0	0	0	0	0	0	0	0	0	0	0	0	0	0	0	63.68	0	0	0	36.32	0	0	0	0	0	0	16.8921
66	0	0	0	0	0	0	0	0	0	0	0	0	0	0	0	0	0	0	0	0	0	0	0	0	0	0	64.68	0	0	0	35.32	0	0	0	0	0	0	16.8297
67	0	0	0	0	0	0	0	0	0	0	0	0	0	0	0	0	0	0	0	0	0	0	0	0	0	0	66.69	0	0	0	33.31	0	0	0	0	0	0	16.4522
68	0	0	0	0	0	0	0	0	0	0	0	0	0	0	0	0	0	0	0	0	0	0	0	0	0	0	76.25	0	0	0	23.75	0	0	0	0	0	0	14.8
69	0	0	0	0	0	0	0	0	0	0	0	0	0	0	0	0	0	0	0	0	0	0	0	0	0	0	81.59	0	0	0	18.41	0	0	0	0	0	0	14.0443
70	0	0	0	0	0	0	0	0	0	0	0	0	0	0	0	0	0	0	0	0	0	0	0	0	0	0	88.89	0	0	0	0	0	11.11	0	0	0	0	6.25681
71	0	0	0	0	0	0	0	0	0	0	0	0	0	0	0	0	0	0	0	0	0	0	0	0	0	0	89.51	0	0	0	0	0	10.49	0	0	0	0	6.18462
72	0	0	0	0	0	0	0	0	0	0	0	0	0	0	0	0	0	0	0	0	0	0	0	0	0	0	90.93	0	0	0	0	0	9.07	0	0	0	0	7.08125
73	0	0	0	0	0	0	0	0	0	0	0	0	0	0	0	0	0	0	0	0	0	0	0	0	0	0	92.26	0	0	0	0	0	7.74	0	0	0	0	7.7
74	0	0	0	0	0	0	0	0	0	0	0	0	0	0	0	0	0	0	0	0	0	0	0	0	0	0	92.84	0	0	0	0	0	7.16	0	0	0	0	7.91327
75	0	0	0	0	0	0	0	0	0	0	0	0	0	0	0	0	0	0	0	0	0	0	0	0	0	0	94.48	0	0	0	0	0	5.52	0	0	0	0	8.525
76	0	0	0	0	0	0	0	0	0	0	0	0	0	0	0	0	0	0	0	0	0	0	0	0	0	0	97.23	0	0	0	0	0	2.76	0	0	0	0	9.53906
77	0	0	0	0	0	0	0	0	0	0	0	0	0	0	0	0	0	0	0	0	0	0	0	0	0	0	97.53	0	0	0	0	0	2.46	0	0	0	0	9.46687
78	0	0	0	0	0	0	0	0	0	0	0	0	0	0	0	0	0	0	0	0	0	0	0	0	0	0	97.77	0	0	0	0	0	2.22	0	0	0	0	9.77953
79	0	0	0	0	0	0	0	0	0	0	0	0	0	0	0	0	0	0	0	0	0	0	0	0	0	0	99.5	0	0	0	0	0	0.5	0	0	0	0	11
80	0	0	0	0	0	0	0	0	0	0	0	0	0	0	0	0	0	0	0	0	0	0	0	0	0	0	99.85	0	0	0	0	0	0.15	0	0	0	0	11.2814
81	0	0	0	0	0	0	0	0	0	0	0	0	0	0	0	0	0	0	0	0	0	0	0	0	0	0	99.91	0	0	0	0	0	0.09	0	0	0	0	12.3558
82	0	0	0	0	0	0	0	0	0	0	0	0	0	0	0	0	0	0	0	0	0	0	0	0	0	49.74	0	50.26	0	0	0	0	0	0	0	0	0	17.5931
83	0	0	0	0	0	0	0	0	0	0	0	0	0	0	0	0	0	0	0	0	0	0	0	0	0	50	0	50	0	0	0	0	0	0	0	0	0	17.2571
84	0	0	0	0	0	0	0	0	0	0	0	0	0	0	0	0	0	0	0	0	0	0	0	0	0	52.2	0	47.8	0	0	0	0	0	0	0	0	0	20.518
85	0	0	0	0	0	0	0	0	0	0	0	0	0	0	0	0	0	0	0	0	0	0	0	0	0	52.58	0	0	0	0	47.42	0	0	0	0	0	0	18.1428
86	0	0	0	0	0	0	0	0	0	0	0	0	0	0	0	0	0	0	0	0	0	0	0	0	0	56.83	0	43.17	0	0	0	0	0	0	0	0	0	13.4908
87	0	0	0	0	0	0	0	0	0	0	0	0	0	0	0	0	0	0	0	0	0	0	0	0	0	58.09	0	0	0	0	41.91	0	0	0	0	0	0	15.2
88	0	0	0	0	0	0	0	0	0	0	0	0	0	0	0	0	0	0	0	0	0	0	0	0	0	61.97	0	38.03	0	0	0	0	0	0	0	0	0	12.289
89	0	0	0	0	0	0	0	0	0	0	0	0	0	0	0	0	0	0	0	0	0	0	0	0	0	67.19	0	32.81	0	0	0	0	0	0	0	0	0	11.5251
90	0	0	0	0	0	0	0	0	0	0	0	0	0	0	0	0	0	0	0	0	0	0	0	0	0	68.38	0	0	0	0	0	25.8	0	5.82	0	0	0	25.9
91	0	0	0	0	0	0	0	0	0	0	0	0	0	0	0	0	0	0	0	0	0	0	0	0	0	72.12	0	0	0	0	27.88	0	0	0	0	0	0	19.3038
92	0	0	0	0	0	0	0	0	0	0	0	0	0	0	0	0	0	0	0	0	0	0	0	0	0	72.14	0	0	0	0	0	27.86	0	0	0	0	0	23.193
93	0	0	0	0	0	0	0	0	0	0	0	0	0	0	0	0	0	0	0	0	0	0	0	0	0	79.59	0	0	0	0	0	20.4	0	0	0	0	0	21.6445
94	0	0	0	0	0	0	0	0	0	0	0	0	0	0	0	0	0	0	0	0	0	0	0	0	0	79.6	0	0	0	0	0	20.4	0	0	0	0	0	21.7723
95	0	0	0	0	0	0	0	0	0	0	0	0	0	0	0	0	0	0	0	0	0	0	0	0	0	80.46	0	0	0	0	0	0	0	19.53	0	0	0	26.7152
96	0	0	0	0	0	0	0	0	0	0	0	0	0	0	0	0	0	0	0	0	0	0	0	0.95	0	47.3	0	51.75	0	0	0	0	0	0	0	0	0	18.8005
97	0	0	0	0	0	0	0	0	0	0	0	0	0	0	0	0	0	0	0	0	0	0	0	2.41	0	48.18	0	49.41	0	0	0	0	0	0	0	0	0	19.3391
98	0	0	0	0	0	0	0	0	0	0	0	0	0	0	0	0	0	0	0	0	0	0	0	4.79	0	0	24.41	70.8	0	0	0	0	0	0	0	0	0	22.2882
99	0	0	0	0	0	0	0	0	0	0	0	0	0	0	0	0	0	0	0	0	0	0	0	4.97	0	0	24.29	70.74	0	0	0	0	0	0	0	0	0	22.2772

## Sheet: Refractive index
Glass ID	INPUT FEATURES																																		OUTPUT
	SiO2	B2O3	Al2O3	MgO	CaO	BaO	Li2O	Na2O	K2O	Ag2O	Cs2O	Tl2O	BeO	NiO	CuO	ZnO	CdO	PbO	Ga2O3	Y2O3	La2O3	Gd2O3	Bi2O3	TiO2	ZrO2	TeO2	P2O5	V2O5	Nb2O5	Ta2O5	MoO3	WO3	H2O	Sm2O3	Refractive Index
1	0	0	0	0	0	0	0	0	0	0	0	0	0	0	0	0	0	0	0	0	0	0	0	0	0	0	13.27	0	0	0	0	86.73	0	0	1.95
2	0	0	0	0	0	0	0	0	0	0	0	0	0	0	0	0	0	0	0	0	0	0	0	0	0	0	14.79	85.2	0	0	0	0	0	0	2
3	0	0	0	0	0	0	0	0	0	0	0	0	0	0	0	0	0	0	0	0	0	0	0	0	0	0	15.47	84.53	0	0	0	0	0	0	1.97
4	0	0	0	0	0	0	0	0	0	0	0	0	0	0	0	0	0	0	0	0	0	0	0	0	0	0	19.77	80.23	0	0	0	0	0	0	1.95
5	0	0	0	0	0	0	0	0	0	0	0	0	0	0	0	0	0	0	0	0	0	0	0	0	0	0	28.04	71.96	0	0	0	0	0	0	1.89
6	0	0	0	0	0	0	0	0	0	0	0	0	0	0	0	0	0	0	0	0	0	0	0	0	0	0	30.51	69.49	0	0	0	0	0	0	1.95
7	0	0	0	0	0	0	0	0	0	0	0	0	0	0	0	0	0	0	0	0	0	0	0	0	0	0	36.11	63.89	0	0	0	0	0	0	1.9
8	0	0	0	0	0	0	0	0	0	0	0	0	0	0	0	0	0	0	0	0	0	0	0	0	0	0	40.12	59.87	0	0	0	0	0	0	1.815
9	0	0	0	0	0	0	0	0	0	0	0	0	0	0	0	0	0	0	0	0	0	0	0	0	0	0	40.13	59.87	0	0	0	0	0	0	1.8175
10	0	0	0	0	0	0	0	0	0	0	0	0	0	0	0	0	0	0	0	0	0	0	0	0	0	0	44.82	55.18	0	0	0	0	0	0	1.82
11	0	0	0	0	0	0	0	0	0	0	0	0	0	0	0	0	0	0	0	0	0	0	0	0	0	0	49.65	0	0	0	50.35	0	0	0	1.82
12	0	0	0	0	0	0	0	0	0	0	0	0	0	0	0	0	0	0	0	0	0	0	0	0	0	0	51.05	48.95	0	0	0	0	0	0	1.76667
13	0	0	0	0	0	0	0	0	0	0	0	0	0	0	0	0	0	0	0	0	0	0	0	0	0	0	54.98	0	0	0	0	0	0	45.02	1.58
14	0	0	0	0	0	0	0	0	0	0	0	0	0	0	0	0	0	0	0	0	0	0	0	0	0	0	60.98	39.01	0	0	0	0	0	0	1.72
15	0	0	0	0	0	0	0	0	0	0	0	0	0	0	0	0	0	0	0	0	0	0	0	0	0	0	60.99	39.01	0	0	0	0	0	0	1.72
16	0	0	0	0	0	0	0	0	0	0	0	0	0	0	0	0	0	0	0	0	0	0	0	0	0	0	70.07	29.93	0	0	0	0	0	0	1.68133
17	0	0	0	0	0	0	0	0	0	0	0	0	0	0	0	0	0	0	0	0	0	0	0	0	0	0	100	0	0	0	0	0	0	0	1.503
18	0	0	0	0	0	0	0	0	0	0	0	0	0	0	0	0	0	0	0	0	0	0	0	0	0	72.19	27.56	0	0	0	0	0	0	0	2.01
19	0	0	0	0	0	0	0	0	0	0	0	0	0	0	0	0	0	0	0	0	0	0	0	0	0	76.19	23.81	0	0	0	0	0	0	0	1.928
20	0	0	0	0	0	0	0	0	0	0	0	0	0	0	0	0	0	0	0	0	0	0	0	0	0	81.81	18.19	0	0	0	0	0	0	0	1.958
21	0	0	0	0	0	0	0	0	0	0	0	0	0	0	0	0	0	0	0	0	0	0	0	0	0	85.51	14.49	0	0	0	0	0	0	0	2.032
22	0	0	0	0	0	0	0	0	0	0	0	0	0	0	0	0	0	0	0	0	0	0	0	0	0	85.88	14.12	0	0	0	0	0	0	0	1.993
23	0	0	0	0	0	0	0	0	0	0	0	0	0	0	0	0	0	0	0	0	0	0	0	0	0	86.43	13.56	0	0	0	0	0	0	0	2.053
24	0	0	0	0	0	0	0	0	0	0	0	0	0	0	0	0	0	0	0	0	0	0	0	0	0	88.48	11.52	0	0	0	0	0	0	0	2.053
25	0	0	0	0	0	0	0	0	0	0	0	0	0	0	0	0	0	0	0	0	0	0	0	0	0	89.18	10.81	0	0	0	0	0	0	0	2.066
26	0	0	0	0	0	0	0	0	0	0	0	0	0	0	0	0	0	0	0	0	0	0	0	36.01	0	0	63.99	0	0	0	0	0	0	0	1.87
27	0	0	0	0	0	0	0	0	0	0	0	0	0	0	0	0	0	0	0	0	0	0	0	45.77	0	0	54.23	0	0	0	0	0	0	0	1.8195
28	0	0	0	0	0	0	0	0	0	0	0	0	0	0	0	0	0	0	0	0	0	0	0	47.87	0	0	52.13	0	0	0	0	0	0	0	1.83133
29	0	0	0	0	0	0	0	0	0	0	0	0	0	0	0	0	0	0	0	0	0	0	0	50.01	0	0	49.99	0	0	0	0	0	0	0	1.86067
30	0	0	0	0	0	0	0	0	0	0	0	0	0	0	0	0	0	0	0	0	0	0	0	52.21	0	0	47.79	0	0	0	0	0	0	0	1.8895
31	0	0	0	0	0	0	0	0	0	0	0	0	0	0	0	0	0	0	0	0	0	0	0	54.46	0	0	45.54	0	0	0	0	0	0	0	1.90033
32	0	0	0	0	0	0	0	0	0	0	0	0	0	0	0	0	0	0	0	0	0	0	0	56.77	0	0	43.23	0	0	0	0	0	0	0	1.93
33	0	0	0	0	0	0	0	0	0	0	0	0	0	0	0	0	0	0	0	0	0	0	0	59.14	0	0	40.86	0	0	0	0	0	0	0	1.94333
34	0	0	0	0	0	0	0	0	0	0	0	0	0	0	0	0	0	0	0	0	0	0	0	59.47	0	0	40.53	0	0	0	0	0	0	0	2.099
35	0	0	0	0	0	0	0	0	0	0	0	0	0	0	0	0	0	0	0	0	0	0	0	61.56	0	0	38.44	0	0	0	0	0	0	0	1.96133
36	0	0	0	0	0	0	0	0	0	0	0	0	0	0	0	0	0	0	0	0	0	0	0	69.24	0	0	30.76	0	0	0	0	0	0	0	2.12
37	0	0	0	0	0	0	0	0	0	0	0	0	0	0	0	0	0	0	0	0	0	0	0	69.79	0	0	30.21	0	0	0	0	0	0	0	2.121
38	0	0	0	0	0	0	0	0	0	0	0	0	0	0	0	0	0	0	0	0	0	0	0	78.83	0	0	21.17	0	0	0	0	0	0	0	2.204
39	0	0	0	0	0	0	0	0	0	0	0	0	0	0	0	0	0	0	0	0	0	0	0	83.51	0	0	16.49	0	0	0	0	0	0	0	2.2
40	0	0	0	0	0	0	0	0	0	0	0	0	0	0	0	0	0	0	0	0	0	0	10.91	0	0	73.87	0	0	15.21	0	0	0	0	0	2.215
41	0	0	0	0	0	0	0	0	0	0	0	0	0	0	0	0	0	0	0	0	0	0	11.32	0	0	65.07	0	0	0	0	0	23.61	0	0	2.215
42	0	0	0	0	0	0	0	0	0	0	0	0	0	0	0	0	0	0	0	0	0	0	11.8	0	0	64.7	0	0	0	0	0	23.5	0	0	2.23
43	0	0	0	0	0	0	0	0	0	0	0	0	0	0	0	0	0	0	0	0	0	0	12.84	0	0	61.6	0	0	0	0	0	25.56	0	0	2.098
44	0	0	0	0	0	0	0	0	0	0	0	0	0	0	0	0	0	0	0	0	0	0	12.96	0	0	55.79	0	0	0	0	0	31.25	0	0	2.224
45	0	0	0	0	0	0	0	0	0	0	0	0	0	0	0	0	0	0	0	0	0	0	13.96	4.78	0	81.26	0	0	0	0	0	0	0	0	2.1489
46	0	0	0	0	0	0	0	0	0	0	0	0	0	0	0	0	0	0	0	0	0	0	15.14	0	0	62.25	0	0	0	0	0	22.61	0	0	2.23
47	0	0	0	0	0	0	0	0	0	0	0	0	0	0	0	0	0	0	0	0	0	0	15.86	0	0	51.14	0	0	0	0	0	33	0	0	2.228
48	0	0	0	0	0	0	0	0	0	0	0	0	0	0	0	0	0	0	0	0	0	0	18.49	0	0	59.59	0	0	0	0	0	21.91	0	0	2.229
49	0	0	0	0	0	0	0	0	0	0	0	0	0	0	0	0	0	0	0	0	0	0	18.89	0	0	56.06	0	0	0	0	0	25.05	0	0	2.052
50	0	0	0	0	0	0	0	0	0	0	0	0	0	0	0	0	0	0	0	0	0	0	24.02	0.82	0	68.31	0	0	6.85	0	0	0	0	0	2.1281
51	0	0	0	0	0	0	0	0	0	0	0	0	0	0	0	0	0	0	0	0	0	0	24.22	1.66	0	67.21	0	0	6.91	0	0	0	0	0	2.1334
52	0	0	0	0	0	0	0	0	0	0	0	0	0	0	0	0	0	0	0	0	0	0	24.43	2.51	0	66.09	0	0	6.97	0	0	0	0	0	2.1364
53	0	0	0	0	0	0	0	0	0	0	0	0	0	0	0	0	0	0	0	0	0	0	25.02	2.14	0	72.84	0	0	0	0	0	0	0	0	2.1152
54	0	0	0	0	0	0	0	0	0	0	0	0	0	0	0	0	0	0	0	0	0	0	25.57	4.38	0	70.05	0	0	0	0	0	0	0	0	2.1808
55	0	0	0	0	0	0	0	0	0	0	0	0	0	0	0	0	0	0	0	0	0	0	26.73	0	0	0	73.27	0	0	0	0	0	0	0	1.5905
56	0	0	0	0	0	0	0	0	0	0	0	0	0	0	0	0	0	0	0	0	0	0	34.68	1.98	0	63.34	0	0	0	0	0	0	0	0	2.187
57	0	0	0	0	0	0	0	0	0	0	0	0	0	0	0	0	0	0	0	0	0	0	35.76	0	0	0	64.24	0	0	0	0	0	0	0	1.6215
58	0	0	0	0	0	0	0	0	0	0	0	0	0	0	0	0	0	0	0	0	0	0	43.7	0	0	56.3	0	0	0	0	0	0	0	0	2.007
59	0	0	0	0	0	0	0	0	0	0	0	0	0	0	0	0	0	0	0	0	0	0	45.84	0	0	0	54.16	0	0	0	0	0	0	0	1.751
60	0	0	0	0	0	0	0	0	0	0	0	0	0	0	0	0	0	0	0	0	0	0	53.56	0	0	0	46.44	0	0	0	0	0	0	0	1.685
61	0	0	0	0	0	0	0	0	0	0	0	0	0	0	0	0	0	0	0	0	0	0	55.46	0	0	44.54	0	0	0	0	0	0	0	0	1.971
62	0	0	0	0	0	0	0	0	0	0	0	0	0	0	0	0	0	0	0	0	0	0	58.45	0	0	0	41.55	0	0	0	0	0	0	0	1.87
63	0	0	0	0	0	0	0	0	0	0	0	0	0	0	0	0	0	0	0	0	0	0	62.21	0	0	0	37.79	0	0	0	0	0	0	0	1.726
64	0	0	0	0	0	0	0	0	0	0	0	0	0	0	0	0	0	0	0	0	0	0	63.87	0	0	0	36.13	0	0	0	0	0	0	0	1.95
65	0	0	0	0	0	0	0	0	0	0	0	0	0	0	0	0	0	0	0	0	0	0	66.06	0	0	33.94	0	0	0	0	0	0	0	0	1.948
66	0	0	0	0	0	0	0	0	0	0	0	0	0	0	0	0	0	0	0	0	0	0	67.82	0	0	0	32.18	0	0	0	0	0	0	0	1.767
67	0	0	0	0	0	0	0	0	0	0	0	0	0	0	0	0	0	0	0	0	0	45.98	0	0	0	0	54.02	0	0	0	0	0	0	0	1.561
68	0	0	0	0	0	0	0	0	0	0	0	0	0	0	0	0	0	0	0	0	10.1	0	0	0	0	65.95	0	0	0	0	0	23.95	0	0	2.151
69	0	0	0	0	0	0	0	0	0	0	0	0	0	0	0	0	0	0	0	0	10.18	0	0	0	0	89.82	0	0	0	0	0	0	0	0	2.11
70	0	0	0	0	0	0	0	0	0	0	0	0	0	0	0	0	0	0	0	0	14.42	0	0	0	0	62.77	0	0	0	0	0	22.8	0	0	2.129
71	0	0	0	0	0	0	0	0	0	0	0	0	0	0	0	0	0	0	0	0	15.27	0	0	0	0	84.73	0	0	0	0	0	0	0	0	2.1
72	0	0	0	0	0	0	0	0	0	0	0	0	0	0	0	0	0	0	0	0	16.77	0	0	0	0	53.4	0	0	0	0	0	29.83	0	0	2.07
73	0	0	0	0	0	0	0	0	0	0	0	0	0	0	0	0	0	0	0	0	16.89	0	0	41.41	0	0	41.7	0	0	0	0	0	0	0	1.87
74	0	0	0	0	0	0	0	0	0	0	0	0	0	0	0	0	0	0	0	0	17.42	0	0	0	0	63.99	0	0	0	0	0	18.59	0	0	2.04
75	0	0	0	0	0	0	0	0	0	0	0	0	0	0	0	0	0	0	0	0	18.34	0	0	0	0	59.9	0	0	0	0	0	21.76	0	0	2.112
76	0	0	0	0	0	0	0	0	0	0	0	0	0	0	0	0	0	0	0	0	19	0	0	0	0	32	0	0	0	0	0	49	0	0	2.08
77	0	0	0	0	0	0	0	0	0	0	0	0	0	0	0	0	0	0	0	0	19.96	0	0	0	0	0	80.04	0	0	0	0	0	0	0	1.569
78	0	0	0	0	0	0	0	0	0	0	0	0	0	0	0	0	0	0	0	0	20.32	0	0	0	0	0	79.68	0	0	0	0	0	0	0	1.5285
79	0	0	0	0	0	0	0	0	0	0	0	0	0	0	0	0	0	0	0	0	20.33	0	0	0	0	79.67	0	0	0	0	0	0	0	0	2.09
80	0	0	0	0	0	0	0	0	0	0	0	0	0	0	0	0	0	0	0	0	21.92	0	0	0	0	57.28	0	0	0	0	0	20.8	0	0	2.099
81	0	0	0	0	0	0	0	0	0	0	0	0	0	0	0	0	0	0	0	0	25	0	0	0	0	0	0	0	0	75	0	0	0	0	2.16
82	0	0	0	0	0	0	0	0	0	0	0	0	0	0	0	0	0	0	0	0	25	0	0	0	0	0	0	0	75	0	0	0	0	0	2.18
83	0	0	0	0	0	0	0	0	0	0	0	0	0	0	0	0	0	0	0	0	25.02	0	0	0	0	0	0	0	74.98	0	0	0	0	0	2.18
84	0	0	0	0	0	0	0	0	0	0	0	0	0	0	0	0	0	0	0	0	28.83	0	0	0	0	0	71.17	0	0	0	0	0	0	0	1.532
85	0	0	0	0	0	0	0	0	0	0	0	0	0	0	0	0	0	0	0	0	29.39	0	0	0	0	28.79	0	0	0	0	0	41.82	0	0	2.026
86	0	0	0	0	0	0	0	0	0	0	0	0	0	0	0	0	0	0	0	0	33.35	0	0	0	0	0	66.64	0	0	0	0	0	0	0	1.57
87	0	0	0	0	0	0	0	0	0	0	0	0	0	0	0	0	0	0	0	0	34.25	0	0	0	0	0	0	0	0	65.75	0	0	0	0	2.16
88	0	0	0	0	0	0	0	0	0	0	0	0	0	0	0	0	0	0	0	0	36.46	0	0	0	0	0	63.54	0	0	0	0	0	0	0	1.542
89	0	0	0	0	0	0	0	0	0	0	0	0	0	0	0	0	0	0	0	0	39.99	0	0	0	0	0	60.01	0	0	0	0	0	0	0	1.584
90	0	0	0	0	0	0	0	0	0	0	0	0	0	0	0	0	0	0	0	0	43.35	0	0	0	0	0	56.65	0	0	0	0	0	0	0	1.59275
91	0	0	0	0	0	0	0	0	0	0	0	0	0	0	0	0	0	0	0	0	44	0	0	0	0	0	56	0	0	0	0	0	0	0	1.601
92	0	0	0	0	0	0	0	0	0	0	0	0	0	0	0	0	0	0	0	0	45.03	0	0	0	0	0	54.97	0	0	0	0	0	0	0	1.57
93	0	0	0	0	0	0	0	0	0	0	0	0	0	0	0	0	0	0	0	0	47.29	0	0	0	0	0	52.71	0	0	0	0	0	0	0	1.618
94	0	0	0	0	0	0	0	0	0	0	0	0	0	0	0	0	0	0	0	0	47.53	0	0	0	0	0	52.47	0	0	0	0	0	0	0	1.618
95	0	0	0	0	0	0	0	0	0	0	0	0	0	0	0	0	0	0	0	0	49.59	0	0	0	0	0	50.41	0	0	0	0	0	0	0	1.611
96	0	0	0	0	0	0	0	0	0	0	0	0	0	0	0	0	0	0	0	0	49.97	0	0	0	0	0	0	0	50.03	0	0	0	0	0	2.2
97	0	0	0	0	0	0	0	0	0	0	0	0	0	0	0	0	0	0	0	0	50	0	0	0	0	0	0	0	0	50	0	0	0	0	2.13
98	0	0	0	0	0	0	0	0	0	0	0	0	0	0	0	0	0	0	0	0	50	0	0	0	0	0	0	0	50	0	0	0	0	0	2.2
99	0	0	0	0	0	0	0	0	0	0	0	0	0	0	0	0	0	0	0	0	50.04	0	0	0	0	0	0	0	0	49.96	0	0	0	0	2.13

## Sheet: Liquidus temperature
Glass ID	INPUT FEATURES																																		OUTPUT
	SiO2	B2O3	Al2O3	MgO	CaO	BaO	Li2O	Na2O	K2O	Ag2O	Cs2O	Tl2O	BeO	NiO	CuO	ZnO	CdO	PbO	Ga2O3	Y2O3	La2O3	Gd2O3	Bi2O3	TiO2	ZrO2	TeO2	P2O5	V2O5	Nb2O5	Ta2O5	MoO3	WO3	H2O	Sm2O3	Liquidus temperature (K)
1	0	0	0	0	0	0	0	0	0	0	0	0	0	0	0	0	0	0	0	0	0	0	0	0	0	0	100	0	0	0	0	0	0	0	853
2	0	0	0	0	0	0	0	0	0	0	0	0	0	0	0	0	0	0	0	0	0	0	62.21	0	0	0	37.79	0	0	0	0	0	0	0	1033
3	0	0	0	0	0	0	0	0	0	0	0	0	0	0	0	0	0	0	0	0	0	0	63.36	0	0	0	36.64	0	0	0	0	0	0	0	1033
4	0	0	0	0	0	0	0	0	0	0	0	0	0	0	0	0	0	0	0	0	0	0	67.82	0	0	0	32.18	0	0	0	0	0	0	0	1063
5	0	0	0	0	0	0	0	0	0	0	0	0	0	0	0	0	0	0	0	0	0	0	68.82	0	0	0	31.18	0	0	0	0	0	0	0	1063
6	0	0	0	0	0	0	0	0	0	0	0	0	0	0	0	0	0	0	0	0	23.84	0	0	0	0	0	76.16	0	0	0	0	0	0	0	1566
7	0	0	0	0	0	0	0	0	0	0	0	0	0	0	0	0	0	0	0	0	26	0	0	0	0	0	0	0	0	0	0	74	0	0	1316
8	0	0	0	0	0	0	0	0	0	0	0	0	0	0	0	0	0	0	0	0	28.83	0	0	0	0	0	71.17	0	0	0	0	0	0	0	1616
9	0	0	0	0	0	0	0	0	0	0	0	0	0	0	0	0	0	0	0	0	29.39	0	0	0	0	28.79	0	0	0	0	0	41.82	0	0	1273
10	0	0	0	0	0	0	0	0	0	0	0	0	0	0	0	0	0	0	0	0	31.98	0	0	0	0	0	68.02	0	0	0	0	0	0	0	1641
11	0	0	0	0	0	0	0	0	0	0	0	0	0	0	0	0	0	0	0	0	36.46	0	0	0	0	0	63.54	0	0	0	0	0	0	0	1596
12	0	0	0	0	0	0	0	0	0	0	0	0	0	0	0	0	0	0	0	0	39.3	0	0	0	0	0	60.7	0	0	0	0	0	0	0	1696
13	0	0	0	0	0	0	0	0	0	0	0	0	0	0	0	0	0	0	0	0	43.35	0	0	0	0	0	56.65	0	0	0	0	0	0	0	1781
14	0	0	0	0	0	0	0	0	0	0	0	0	0	0	0	0	0	61.13	0	0	0	0	0	0	0	0	38.87	0	0	0	0	0	0	0	937
15	0	0	0	0	0	0	0	0	0	0	0	0	0	0	0	0	0	65.78	0	0	0	0	0	0	0	0	34.22	0	0	0	0	0	0	0	912
16	0	0	0	0	0	0	0	0	0	0	0	0	0	0	0	2.24	0	0	0	0	41.35	0	0	0	0	0	56.4	0	0	0	0	0	0	0	1710
17	0	0	0	0	0	0	0	0	0	0	0	0	0	0	0	4.61	0	0	0	0	40.65	0	0	0	0	0	54.73	0	0	0	0	0	0	0	1701
18	0	0	0	0	0	0	0	0	0	0	0	0	0	0	0	7.27	0	0	0	0	36.89	0	0	0	0	0	55.83	0	0	0	0	0	0	0	1613
19	0	0	0	0	0	0	0	0	0	0	0	0	0	0	0	11.71	0	0	0	0	0	0	44.68	0	0	0	0	43.61	0	0	0	0	0	0	886.49
20	0	0	0	0	0	0	0	0	0	0	0	0	0	0	0	13.18	0	0	0	0	31.66	0	0	0	0	0	55.16	0	0	0	0	0	0	0	1583
21	0	0	0	0	0	0	0	0	0	0	0	0	0	0	0	15.05	0	0	0	0	0	0	36.92	0	0	0	0	48.03	0	0	0	0	0	0	911.26
22	0	0	0	0	0	0	0	0	0	0	0	0	0	0	0	19.14	0	0	0	0	0	0	27.39	0	0	0	0	53.47	0	0	0	0	0	0	902.08
23	0	0	0	0	0	0	0	0	0	0	0	0	0	0	0	23.29	0	0	0	0	27.97	0	0	0	0	0	48.74	0	0	0	0	0	0	0	1421
24	0	0	0	0	0	0	0	0	0	0	0	0	0	0	0	24.28	0	0	0	0	0	0	15.44	0	0	0	0	60.28	0	0	0	0	0	0	907.58
25	0	0	0	0	0	0	0	0	0	0	0	0	0	0	0	28.3	0	0	0	0	20.14	0	0	0	0	0	51.55	0	0	0	0	0	0	0	1538
26	0	0	0	0	0	0	0	0	0	0	0	0	0	0	0	31.97	0	0	0	0	21.76	0	0	0	0	0	46.27	0	0	0	0	0	0	0	1501
27	0	0	0	0	0	0	0	0	0	0	0	0	0	0	0	36.44	0	0	0	0	0	0	0	0	0	0	63.56	0	0	0	0	0	0	0	1406
28	0	0	0	0	0	0	0	0	0	0	0	0	0	0	0	37.37	0	0	0	0	0	0	0	0	0	0	62.62	0	0	0	0	0	0	0	1406
29	0	0	0	0	0	0	0	0	0	0	0	0	0	0	0	40.23	0	0	0	0	0	0	0	0	0	0	59.77	0	0	0	0	0	0	0	1376
30	0	0	0	0	0	0	0	0	0	0	0	0	0	0	0	40.69	0	0	0	0	14.04	0	0	0	0	0	45.27	0	0	0	0	0	0	0	1523
31	0	0	0	0	0	0	0	0	0	0	0	0	0	0	0	42.19	0	0	0	0	0	0	0	0	0	0	57.81	0	0	0	0	0	0	0	1350
32	0	0	0	0	0	0	0	0	0	0	0	0	0	0	0	42.54	0	0	0	0	14.19	0	0	0	0	0	43.27	0	0	0	0	0	0	0	1521
33	0	0	0	0	0	0	0	0	0	0	0	0	0	0	0	44.19	0	0	0	0	0	0	0	0	0	0	55.81	0	0	0	0	0	0	0	1446
34	0	0	0	0	0	0	0	0	0	0	0	0	0	0	0	46.24	0	0	0	0	0	0	0	0	0	0	53.76	0	0	0	0	0	0	0	1506
35	0	0	0	0	0	0	0	0	0	0	0	0	0	0	0	47.71	0	0	0	0	6.06	0	0	0	0	0	46.22	0	0	0	0	0	0	0	1531
36	0	0	0	0	0	0	0	0	0	0	0	0	0	0	0	53.42	0	0	0	0	0	0	0	0	0	0	46.58	0	0	0	0	0	0	0	1516
37	0	0	0	0	0	0	0	0	0	0	0	0	0	0	0	63.24	0	0	0	0	0	0	0	0	0	0	36.76	0	0	0	0	0	0	0	1583
38	0	0	0	0	0	0	0	0	11.27	0	0	0	0	0	0	0	0	0	0	0	0	0	0	0	0	70.33	0	0	18.41	0	0	0	0	0	985
39	0	0	0	0	0	0	0	0	16.44	0	0	0	0	0	0	0	0	0	0	0	0	0	0	83.56	0	0	0	0	0	0	0	0	0	0	1763
40	0	0	0	0	0	0	0	0	19.12	0	0	0	0	0	0	0	0	0	0	0	0	0	0	80.88	0	0	0	0	0	0	0	0	0	0	1609
41	0	0	0	0	0	0	0	0	28.22	0	0	0	0	0	0	0	0	0	0	0	0	0	0	71.78	0	0	0	0	0	0	0	0	0	0	1518
42	0	0	0	0	0	0	0	0	37.06	0	0	0	0	0	0	0	0	0	0	0	0	0	0	62.94	0	0	0	0	0	0	0	0	0	0	1288
43	0	0	0	0	0	0	0	0	54.11	0	0	0	0	0	0	0	0	0	0	0	0	0	0	45.89	0	0	0	0	0	0	0	0	0	0	1143
44	0	0	0	0	0	0	0	0.47	2.83	0	0	0	0	0	0	0	0	0	0	0	0	0	43.73	5.99	0	0	13.32	0	24.95	0	0	8.71	0	0	1313
45	0	0	0	0	0	0	0	2.31	0	0	0	0	0	0	0	0	0	0	0	0	0	0	43.45	3.58	0	0	13.24	0	28.77	0	0	8.65	0	0	1313
46	0	0	0	0	0	0	0	2.31	0	0	0	0	0	0	0	0	0	0	0	0	0	0	52.13	3.57	0	0	13.24	0	28.75	0	0	0	0	0	1313
47	0	0	0	0	0	0	0	10	2.8	0	0	0	0	0	0	0	0	0	0	0	0	0	0	3	0	0	18.4	0	16.1	4	0	45.7	0	0	1123
48	0	0	0	0	0	0	0	16.25	0	0	0	0	0	0	0	0	0	0	0	0	0	0	0	83.75	0	0	0	0	0	0	0	0	0	0	1550
49	0	0	0	0	0	0	0	24.95	0	0	0	0	0	0	0	0	0	0	0	0	0	0	0	75.04	0	0	0	0	0	0	0	0	0	0	1381
50	0	0	0	0	0	0	0	30.39	0	0	0	0	0	0	0	0	0	0	0	0	0	0	0	0	0	0	69.61	0	0	0	0	0	0	0	923
51	0	0	0	0	0	0	0	34.09	0	0	0	0	0	0	0	0	0	0	0	0	0	0	0	65.91	0	0	0	0	0	0	0	0	0	0	1304
52	0	0	0	0	0	0	0	43.69	0	0	0	0	0	0	0	0	0	0	0	0	0	0	0	56.31	0	0	0	0	0	0	0	0	0	0	1290
53	0	0	0	0	0	0	0	53.79	0	0	0	0	0	0	0	0	0	0	0	0	0	0	0	46.21	0	0	0	0	0	0	0	0	0	0	1135
54	0	0	0	0	0	0	0.23	1.89	0	0	0	0	0	0	0	0	0	0	0	0	0	0	44.27	6.07	0	0	13.48	0	25.25	0	0	8.81	0	0	1313
55	0	0	0	0	0	0	0.65	6.23	7.74	0	0	0	0	0	0	21.49	0	0	0	0	0	0	0	4.54	0	0	36.29	0	23.06	0	0	0	0	0	1083
56	0	0	0	0	0	0	2.07	6.26	0.68	0	0	0	0	0	0	27.38	0	0	0	0	0	0	0	3.68	0	0	35.91	0	24.02	0	0	0	0	0	1153
57	0	0	0	0	0	0	2.1	9.2	0	0	0	0	0	0	0	2.2	0	0	0	0	0	0	19.2	4.3	0	0	23.1	0	24.7	0	0	13.2	0	0	1123
58	0	0	0	0	0	0	2.34	9.08	0	0	0	0	0	0	0	24.84	0	0	0	0	0	0	0	4.2	0	0	35.04	0	24.5	0	0	0	0	0	1123
59	0	0	0	0	0	0	2.48	4.61	0	0	0	0	0	0	0	22.69	0	0	0	0	0	0	0	3.56	0	0	43.43	0	23.23	0	0	0	0	0	1023
60	0	0	0	0	0	0	3.95	7.53	0	0	0	0	0	0	0	20.72	0	0	0	0	0	0	0	0	0	0	36.08	0	31.72	0	0	0	0	0	1093
61	0	0	0	0	0	1.51	0	4.54	4.53	0	0	0	0	0	0	0	0	0	0	0	0	0	0	17.13	0	0	24.16	0	42.36	0	0	5.54	0	0	1338
62	0	0	0	0	0	1.53	0	4.57	3.76	0	0	0	0	0	0	0	0	0	0	0	0	0	0	17.29	0	0	24.3	0	42.71	0	0	5.59	0	0	1338
63	0	0	0	0	0	1.53	0	4.58	3.77	0	0	0	0	0	0	0	0	0	0	0	0	0	0	17.33	0	0	24.36	0	42.81	0	0	5.6	0	0	1335.5
64	0	0	0	0	0	8.66	0	0.44	0	0	0	0	0	0	0	0	0	0	0	0	0	0	41.12	5.63	0	0	12.52	0	23.46	0	0	8.17	0	0	1313
65	0	0	0	0	0	24.87	4.37	5.19	3.01	0	0	0	0	0	0	8.28	0	0	0	0	0	0	5.98	0	0	0	48.3	0	0	0	0	0	0	0	1023
66	0	0	0	0	0	25.84	3.47	6.79	3.57	0	0	0	0	0	0	6.51	0	0	0	0	0	0	4.71	0	0	0	41.27	0	7.84	0	0	0	0	0	973
67	0	0	0	0	0	26.05	2.64	6.01	3.48	0	0	0	0	0	0	9.6	0	0	0	0	0	0	2.75	0	0	0	43.2	0	6.26	0	0	0	0	0	1023
68	0	0	0	0	0	26.1	2.64	6.01	3.48	0	0	0	0	0	0	9.6	0	0	0	0	0	0	2.75	0	0	0	43.16	0	6.26	0	0	0	0	0	1023
69	0	0	0	0	0	26.31	3.02	7.18	3.52	0	0	0	0	0	0	7.27	0	0	0	0	0	0	2.78	0	0	0	43.61	0	6.32	0	0	0	0	0	1023
70	0	0	0	0	0	26.35	3.02	7.17	3.52	0	0	0	0	0	0	7.27	0	0	0	0	0	0	2.78	0	0	0	43.57	0	6.32	0	0	0	0	0	1023
71	0	0	0	0	0	27.5	3.71	6.76	3.68	0	0	0	0	0	0	7.6	0	0	0	0	0	0	2.91	0	0	0	41.23	0	6.61	0	0	0	0	0	1023
72	0	0	0	0	0	27.55	3.72	6.75	3.67	0	0	0	0	0	0	7.6	0	0	0	0	0	0	2.91	0	0	0	41.19	0	6.61	0	0	0	0	0	1023
73	0	0	0	0	0	28.36	4.21	6.46	3.78	0	0	0	0	0	0	7.84	0	0	0	0	0	0	2.99	0	0	0	39.52	0	6.84	0	0	0	0	0	973
74	0	0	0	0	0	28.41	4.22	6.45	3.78	0	0	0	0	0	0	7.83	0	0	0	0	0	0	2.98	0	0	0	39.5	0	6.83	0	0	0	0	0	973
75	0	0	0	0	0	40	0	0	0	0	0	0	0	0	0	0	0	25	0	0	0	0	0	0	0	0	35	0	0	0	0	0	0	0	1013
76	0	0	0	0	0	43	0	0	0	0	0	0	0	0	0	0	0	0	0	0	1	0	0	0	0	0	56	0	0	0	0	0	0	0	1123
77	0	0	0	0	0	45	0	0	0	0	0	0	0	0	0	0	0	0	0	0	0	0	0	0	0	0	53	0	0	0	0	0	0	0	1123
78	0	0	0	0	0	53	0	0	0	0	0	0	0	0	0	0	0	0	0	0	0	0	3	0	0	0	41	0	3	0	0	0	0	0	1093
79	0	0	0	0	0	55.5	0	0	0	0	0	0	0	0	0	0	0	0	0	0	0	0	0	0	0	0	43	0	1.5	0	0	0	0	0	1123
80	0	0	0	0	0.24	0	0	8.48	7.71	0	0	0	0	0	0	21.49	0	0	0	0	0	0	0	1.66	0	0	33.33	0	26.65	0	0	0	0	0	1063
81	0	0	0	0	0.68	0	0	7.47	7.57	0	0	0	0	0	0	19.23	0	0	0	0	0	0	0	0	0	0	31.91	0	31.89	0	0	0	0	0	1103
82	0	0	0	0	2	29.1	3.3	5.5	1	0	0	0	0	0	0	0	0	0	0	0	0	0	0	11.1	0	0	27.8	0	0	0	0	19.3	0	0	1273
83	0	0	0	0	3	53	0	0	0	0	0	0	0	0	0	0	0	0	0	0	0	0	3	0	0	0	41	0	0	0	0	0	0	0	1033
84	0	0	0	0	5.53	0	0	24.46	0	0	0	0	0	0	0	0	0	0	0	0	0	0	0	0	0	0	70.01	0	0	0	0	0	0	0	1013
85	0	0	0	0	11.13	0	0	18.45	0	0	0	0	0	0	0	0	0	0	0	0	0	0	0	0	0	0	70.42	0	0	0	0	0	0	0	1033
86	0	0	0	0	12.34	0	0	0	0	0	0	0	0	0	0	0	0	0	87.66	0	0	0	0	0	0	0	0	0	0	0	0	0	0	0	1730
87	0	0	0	0	15.49	0	0	0	0	0	0	0	0	0	0	0	0	0	84.5	0	0	0	0	0	0	0	0	0	0	0	0	0	0	0	1730
88	0	0	0	0	16.79	0	0	12.37	0	0	0	0	0	0	0	0	0	0	0	0	0	0	0	0	0	0	70.84	0	0	0	0	0	0	0	1048
89	0	0	0	0	19.03	0	0	0	0	0	0	0	0	0	0	0	0	0	80.97	0	0	0	0	0	0	0	0	0	0	0	0	0	0	0	1596
90	0	0	0	0	21.64	0	0	0	0	0	0	0	0	0	0	0	0	0	78.36	0	0	0	0	0	0	0	0	0	0	0	0	0	0	0	1643
91	0	0	0	0	22.52	0	0	6.22	0	0	0	0	0	0	0	0	0	0	0	0	0	0	0	0	0	0	71.26	0	0	0	0	0	0	0	1153
92	0	0	0	0	26.78	0	0	0	0	0	0	0	0	0	0	0	0	0	73.22	0	0	0	0	0	0	0	0	0	0	0	0	0	0	0	1613
93	0	0	0	0	27.28	0	0	0	0	0	0	0	0	0	0	0	0	0	0	0	0	0	0	0	0	0	72.72	0	0	0	0	0	0	0	1238
94	0	0	0	0	28.32	0	0	0	0	0	0	0	0	0	0	0	0	0	0	0	0	0	0	0	0	0	71.68	0	0	0	0	0	0	0	1229.5
95	0	0	0	0	29.43	0	2.91	0	0	0	0	0	0	0	0	0	0	0	0	0	0	0	0	0	0	0	67.66	0	0	0	0	0	0	0	1023
96	0	0	0	0	33.27	0	0	0	0	0	0	0	0	0	0	0	0	0	66.73	0	0	0	0	0	0	0	0	0	0	0	0	0	0	0	1518
97	0	0	0	2	0	38	0	0	0	0	0	0	0	0	0	0	0	25	0	0	0	0	0	0	0	0	35	0	0	0	0	0	0	0	1023
98	0	0	0	9.77	9.29	0	0	3.51	0	0	0	0	0	0	0	0	0	0	0	0	0	0	0	0	0	0	77.43	0	0	0	0	0	0	0	1247
99	0	0	0	9.98	9.53	0	0	6.95	0	0	0	0	0	0	0	0	0	0	0	0	0	0	0	0	0	0	73.54	0	0	0	0	0	0	0	1136

## Sheet: Hardness
Glass ID	INPUT FEATURES																																OUTPUT
	SiO2	B2O3	Al2O3	MgO	CaO	BaO	Li2O	Na2O	K2O	Ag2O	Cs2O	Tl2O	BeO	NiO	CuO	ZnO	PbO	Y2O3	La2O3	Gd2O3	Bi2O3	TiO2	ZrO2	TeO2	P2O5	V2O5	MoO3	WO3	Sm2O3	MgF2	PbF2	PbCl2	Hardness (GPa)
1	60.84	0	0	0	5.08	0	0	16.39	0	0	0	0	0	0	0	0	0	0	0	0	0	0	17.69	0	0	0	0	0	0	0	0	0	6.94
2	60.5	0	1.44	0	0	0	0.42	9.67	0	0	0	0	0	0	0	0	0	0	0	0	0	0	27.96	0	0	0	0	0	0	0	0	0	7.1
3	76.54	4.92	0	0	0	0	0	18.54	0	0	0	0	0	0	0	0	0	0	0	0	0	0	0	0	0	0	0	0	0	0	0	0	4.684
4	74.61	7.41	0	0	0	0	0	17.97	0	0	0	0	0	0	0	0	0	0	0	0	0	0	0	0	0	0	0	0	0	0	0	0	5.027
5	72.69	10	0	0	0	0	0	17.3	0	0	0	0	0	0	0	0	0	0	0	0	0	0	0	0	0	0	0	0	0	0	0	0	5.429
6	68.9	15.02	0	0	0	0	0	16.08	0	0	0	0	0	0	0	0	0	0	0	0	0	0	0	0	0	0	0	0	0	0	0	0	5.762
7	65.06	19.96	0	0	0	0	0	14.98	0	0	0	0	0	0	0	0	0	0	0	0	0	0	0	0	0	0	0	0	0	0	0	0	5.792
8	61.26	24.96	0	0	0	0	0	13.79	0	0	0	0	0	0	0	0	0	0	0	0	0	0	0	0	0	0	0	0	0	0	0	0	5.664
9	57.51	29.88	0	0	0	0	0	12.61	0	0	0	0	0	0	0	0	0	0	0	0	0	0	0	0	0	0	0	0	0	0	0	0	5.233
10	4.49	67.69	0	0	0	0	0	27.81	0	0	0	0	0	0	0	0	0	0	0	0	0	0	0	0	0	0	0	0	0	0	0	0	4.714
11	9.05	62.93	0	0	0	0	0	28.01	0	0	0	0	0	0	0	0	0	0	0	0	0	0	0	0	0	0	0	0	0	0	0	0	5.106
12	13.68	58.11	0	0	0	0	0	28.22	0	0	0	0	0	0	0	0	0	0	0	0	0	0	0	0	0	0	0	0	0	0	0	0	5.811
13	18.37	53.21	0	0	0	0	0	28.42	0	0	0	0	0	0	0	0	0	0	0	0	0	0	0	0	0	0	0	0	0	0	0	0	5.811
14	23.13	48.24	0	0	0	0	0	28.63	0	0	0	0	0	0	0	0	0	0	0	0	0	0	0	0	0	0	0	0	0	0	0	0	5.655
15	27.96	43.19	0	0	0	0	0	28.84	0	0	0	0	0	0	0	0	0	0	0	0	0	0	0	0	0	0	0	0	0	0	0	0	5.606
16	32.86	38.08	0	0	0	0	0	29.06	0	0	0	0	0	0	0	0	0	0	0	0	0	0	0	0	0	0	0	0	0	0	0	0	6.056
17	4.47	72.48	0	0	0	0	0	23.05	0	0	0	0	0	0	0	0	0	0	0	0	0	0	0	0	0	0	0	0	0	0	0	0	4.488
18	9	67.79	0	0	0	0	0	23.21	0	0	0	0	0	0	0	0	0	0	0	0	0	0	0	0	0	0	0	0	0	0	0	0	4.724
19	13.6	63.02	0	0	0	0	0	23.38	0	0	0	0	0	0	0	0	0	0	0	0	0	0	0	0	0	0	0	0	0	0	0	0	4.91
20	18.26	58.19	0	0	0	0	0	23.55	0	0	0	0	0	0	0	0	0	0	0	0	0	0	0	0	0	0	0	0	0	0	0	0	4.988
21	22.99	53.28	0	0	0	0	0	23.72	0	0	0	0	0	0	0	0	0	0	0	0	0	0	0	0	0	0	0	0	0	0	0	0	5.468
22	4.44	77.22	0	0	0	0	0	18.33	0	0	0	0	0	0	0	0	0	0	0	0	0	0	0	0	0	0	0	0	0	0	0	0	3.704
23	8.95	72.59	0	0	0	0	0	18.46	0	0	0	0	0	0	0	0	0	0	0	0	0	0	0	0	0	0	0	0	0	0	0	0	3.763
24	13.52	67.88	0	0	0	0	0	18.59	0	0	0	0	0	0	0	0	0	0	0	0	0	0	0	0	0	0	0	0	0	0	0	0	4.312
25	18.16	63.11	0	0	0	0	0	18.73	0	0	0	0	0	0	0	0	0	0	0	0	0	0	0	0	0	0	0	0	0	0	0	0	4.635
26	22.86	58.27	0	0	0	0	0	18.86	0	0	0	0	0	0	0	0	0	0	0	0	0	0	0	0	0	0	0	0	0	0	0	0	5.096
27	27.63	53.36	0	0	0	0	0	19	0	0	0	0	0	0	0	0	0	0	0	0	0	0	0	0	0	0	0	0	0	0	0	0	5.419
28	32.48	48.38	0	0	0	0	0	19.14	0	0	0	0	0	0	0	0	0	0	0	0	0	0	0	0	0	0	0	0	0	0	0	0	5.645
29	42.38	38.19	0	0	0	0	0	19.43	0	0	0	0	0	0	0	0	0	0	0	0	0	0	0	0	0	0	0	0	0	0	0	0	6.086
30	63.1	16.87	0	0	0	0	0	20.03	0	0	0	0	0	0	0	0	0	0	0	0	0	0	0	0	0	0	0	0	0	0	0	0	6.282
31	4.39	86.54	0	0	0	0	0	9.06	0	0	0	0	0	0	0	0	0	0	0	0	0	0	0	0	0	0	0	0	0	0	0	0	2.685
32	8.85	82.02	0	0	0	0	0	9.13	0	0	0	0	0	0	0	0	0	0	0	0	0	0	0	0	0	0	0	0	0	0	0	0	2.754
33	13.37	77.44	0	0	0	0	0	9.19	0	0	0	0	0	0	0	0	0	0	0	0	0	0	0	0	0	0	0	0	0	0	0	0	3.107
34	17.95	72.79	0	0	0	0	0	9.26	0	0	0	0	0	0	0	0	0	0	0	0	0	0	0	0	0	0	0	0	0	0	0	0	3.508
35	22.6	68.08	0	0	0	0	0	9.32	0	0	0	0	0	0	0	0	0	0	0	0	0	0	0	0	0	0	0	0	0	0	0	0	3.763
36	27.31	63.29	0	0	0	0	0	9.39	0	0	0	0	0	0	0	0	0	0	0	0	0	0	0	0	0	0	0	0	0	0	0	0	3.881
37	32.1	58.44	0	0	0	0	0	9.46	0	0	0	0	0	0	0	0	0	0	0	0	0	0	0	0	0	0	0	0	0	0	0	0	3.92
38	36.95	53.52	0	0	0	0	0	9.53	0	0	0	0	0	0	0	0	0	0	0	0	0	0	0	0	0	0	0	0	0	0	0	0	3.998
39	41.88	48.52	0	0	0	0	0	9.6	0	0	0	0	0	0	0	0	0	0	0	0	0	0	0	0	0	0	0	0	0	0	0	0	4.557
40	51.95	38.3	0	0	0	0	0	9.74	0	0	0	0	0	0	0	0	0	0	0	0	0	0	0	0	0	0	0	0	0	0	0	0	5.41
41	52.08	0	0	0	0	0	0	0	17.36	0	0	0	0	0	0	0	30.56	0	0	0	0	0	0	0	0	0	0	0	0	0	0	0	3.783
42	55.76	0	0	0	0	0	0	0	18.59	0	0	0	0	0	0	0	25.65	0	0	0	0	0	0	0	0	0	0	0	0	0	0	0	4.381
43	58.14	0	0	0	0	0	0	0	19.38	0	0	0	0	0	0	0	22.48	0	0	0	0	0	0	0	0	0	0	0	0	0	0	0	4.528
44	60	0	0	0	0	0	0	0	20	0	0	0	0	0	0	0	20	0	0	0	0	0	0	0	0	0	0	0	0	0	0	0	4.782
45	62.5	0	0	0	0	0	0	0	20.83	0	0	0	0	0	0	0	16.67	0	0	0	0	0	0	0	0	0	0	0	0	0	0	0	4.792
46	68.18	0	0	0	0	0	0	0	22.73	0	0	0	0	0	0	0	9.09	0	0	0	0	0	0	0	0	0	0	0	0	0	0	0	4.469
47	71.56	0	0	0	0	0	0	0	23.85	0	0	0	0	0	0	0	4.58	0	0	0	0	0	0	0	0	0	0	0	0	0	0	0	3.724
48	57.55	0	0	0	0	0	0	0	14.39	0	0	0	0	0	0	0	28.06	0	0	0	0	0	0	0	0	0	0	0	0	0	0	0	4.273
49	62.02	0	0	0	0	0	0	0	15.5	0	0	0	0	0	0	0	22.48	0	0	0	0	0	0	0	0	0	0	0	0	0	0	0	4.449
50	66.95	0	0	0	0	0	0	0	16.74	0	0	0	0	0	0	0	16.32	0	0	0	0	0	0	0	0	0	0	0	0	0	0	0	4.606
51	70.18	0	0	0	0	0	0	0	17.54	0	0	0	0	0	0	0	12.28	0	0	0	0	0	0	0	0	0	0	0	0	0	0	0	4.851
52	73.06	0	0	0	0	0	0	0	18.26	0	0	0	0	0	0	0	8.68	0	0	0	0	0	0	0	0	0	0	0	0	0	0	0	4.792
53	76.41	0	0	0	0	0	0	0	19.1	0	0	0	0	0	0	0	4.49	0	0	0	0	0	0	0	0	0	0	0	0	0	0	0	4.577
54	79.05	0	0	0	0	0	0	0	19.76	0	0	0	0	0	0	0	1.19	0	0	0	0	0	0	0	0	0	0	0	0	0	0	0	4.185
55	8.86	0	0	0	0	0	0	0	5.56	0	0	0	0	0	0	0	85.58	0	0	0	0	0	0	0	0	0	0	0	0	0	0	0	4.302
56	8.54	0	0	0	0	0	0	0	2.68	0	0	0	0	0	0	0	88.79	0	0	0	0	0	0	0	0	0	0	0	0	0	0	0	4.155
57	8.35	0	0	0	0	0	0	0	1.05	0	0	0	0	0	0	0	90.6	0	0	0	0	0	0	0	0	0	0	0	0	0	0	0	4.067
58	8.29	0	0	0	0	0	0	0	0.52	0	0	0	0	0	0	0	91.19	0	0	0	0	0	0	0	0	0	0	0	0	0	0	0	4.028
59	56.57	0	0.29	0	0	0	0	0	22.95	0	0	0	0	0	0	20.18	0	0	0	0	0	0	0	0	0	0	0	0	0	0	0	0	5.38
60	51.43	0	0.89	0	0	28.81	0	0	18.87	0	0	0	0	0	0	0	0	0	0	0	0	0	0	0	0	0	0	0	0	0	0	0	4.547
61	59.29	0	0	0	0	25.21	0	0	15.49	0	0	0	0	0	0	0	0	0	0	0	0	0	0	0	0	0	0	0	0	0	0	0	4.812
62	61.58	0	0.31	0	14.54	0	0	0	23.56	0	0	0	0	0	0	0	0	0	0	0	0	0	0	0	0	0	0	0	0	0	0	0	4.822
63	70.58	0	0	0	10.98	0	0	0	18.44	0	0	0	0	0	0	0	0	0	0	0	0	0	0	0	0	0	0	0	0	0	0	0	5.988
64	72.83	0	0	8.14	0	0	0	0	19.03	0	0	0	0	0	0	0	0	0	0	0	0	0	0	0	0	0	0	0	0	0	0	0	5.361
65	67.49	0	0.51	0	0	0	0	0	24.99	0	0	0	7.01	0	0	0	0	0	0	0	0	0	0	0	0	0	0	0	0	0	0	0	5.223
66	8.61	0	0	0	0	0	0	1.78	0	0	0	0	0	0	0	0	89.61	0	0	0	0	0	0	0	0	0	0	0	0	0	0	0	4.126
67	8.38	0	0	0	0	0	0	0.69	0	0	0	0	0	0	0	0	90.92	0	0	0	0	0	0	0	0	0	0	0	0	0	0	0	4.047
68	8.31	0	0	0	0	0	0	0.34	0	0	0	0	0	0	0	0	91.35	0	0	0	0	0	0	0	0	0	0	0	0	0	0	0	3.998
69	9.03	0	0	0	0	0	0	3.73	0	0	0	0	0	0	0	0	87.24	0	0	0	0	0	0	0	0	0	0	0	0	0	0	0	4.224
70	46.91	0	0	0	0	0	0	11.99	0	0	0	0	0	0	0	0	41.1	0	0	0	0	0	0	0	0	0	0	0	0	0	0	0	4.038
71	51.27	0	0	0	0	0	0	10.59	0	0	0	0	0	0	0	0	38.14	0	0	0	0	0	0	0	0	0	0	0	0	0	0	0	4.292
72	55.83	0	0	0	0	0	0	9.6	0	0	0	0	0	0	0	0	34.57	0	0	0	0	0	0	0	0	0	0	0	0	0	0	0	5.116
73	66.57	0	0	0	0	0	0	17.16	0	0	0	0	0	0	0	0	16.27	0	0	0	0	0	0	0	0	0	0	0	0	0	0	0	4.234
74	56.38	0	0	0	0	0	0	14.54	0	0	0	0	0	0	0	0	29.08	0	0	0	0	0	0	0	0	0	0	0	0	0	0	0	4.361
75	48.14	0	0	0	0	0	0	12.41	0	0	0	0	0	0	0	0	39.44	0	0	0	0	0	0	0	0	0	0	0	0	0	0	0	4.381
76	41.34	0	0	0	0	0	0	10.66	0	0	0	0	0	0	0	0	47.99	0	0	0	0	0	0	0	0	0	0	0	0	0	0	0	4.312
77	30.79	0	0	0	0	0	0	7.94	0	0	0	0	0	0	0	0	61.27	0	0	0	0	0	0	0	0	0	0	0	0	0	0	0	4.008
78	16.95	0	0	0	0	0	0	4.37	0	0	0	0	0	0	0	0	78.68	0	0	0	0	0	0	0	0	0	0	0	0	0	0	0	2.646
79	57.2	0	0	0	0	0	0	11.8	0	0	0	0	0	0	0	30.99	0	0	0	0	0	0	0	0	0	0	0	0	0	0	0	0	5.351
80	36.54	0	0	0	0	55.93	0	7.53	0	0	0	0	0	0	0	0	0	0	0	0	0	0	0	0	0	0	0	0	0	0	0	0	5.047
81	56.89	0	0	0	28.44	0	0	14.67	0	0	0	0	0	0	0	0	0	0	0	0	0	0	0	0	0	0	0	0	0	0	0	0	5.586
82	58.81	0	0	0	26.02	0	0	15.16	0	0	0	0	0	0	0	0	0	0	0	0	0	0	0	0	0	0	0	0	0	0	0	0	5.635
83	60.73	0	0	0	23.61	0	0	15.66	0	0	0	0	0	0	0	0	0	0	0	0	0	0	0	0	0	0	0	0	0	0	0	0	5.762
84	68.32	0	0	0	14.06	0	0	17.62	0	0	0	0	0	0	0	0	0	0	0	0	0	0	0	0	0	0	0	0	0	0	0	0	5.909
85	69.68	0	0	0	4.64	0	0	25.67	0	0	0	0	0	0	0	0	0	0	0	0	0	0	0	0	0	0	0	0	0	0	0	0	4.773
86	70.43	0	0	0	9.34	0	0	20.23	0	0	0	0	0	0	0	0	0	0	0	0	0	0	0	0	0	0	0	0	0	0	0	0	5.429
87	70.2	0	0	0	11.7	0	0	18.1	0	0	0	0	0	0	0	0	0	0	0	0	0	0	0	0	0	0	0	0	0	0	0	0	5.713
88	70.37	0	0	0	14.07	0	0	15.55	0	0	0	0	0	0	0	0	0	0	0	0	0	0	0	0	0	0	0	0	0	0	0	0	5.929
89	70.62	0	0	0	18.86	0	0	10.52	0	0	0	0	0	0	0	0	0	0	0	0	0	0	0	0	0	0	0	0	0	0	0	0	6.076
90	72.07	0	0	0	9.34	0	0	18.58	0	0	0	0	0	0	0	0	0	0	0	0	0	0	0	0	0	0	0	0	0	0	0	0	5.508
91	75.8	0	0	0	4.65	0	0	19.55	0	0	0	0	0	0	0	0	0	0	0	0	0	0	0	0	0	0	0	0	0	0	0	0	4.91
92	84.6	0	0	0	0	0	0	15.4	0	0	0	0	0	0	0	0	0	0	0	0	0	0	0	0	0	0	0	0	0	0	0	0	4.41
93	69.68	0	0	0	0	0	9.9	0	0	0	0	0	0	0	0	0	0	0	0	0	0	0	20.41	0	0	0	0	0	0	0	0	0	6.958
94	74.11	0	0	0	0	0	10.17	0	0	0	0	0	0	0	0	0	0	0	0	0	0	0	15.72	0	0	0	0	0	0	0	0	0	6.635
95	78.78	0	0	0	0	0	10.45	0	0	0	0	0	0	0	0	0	0	0	0	0	0	0	10.77	0	0	0	0	0	0	0	0	0	6.252
96	83.72	0	0	0	0	0	10.74	0	0	0	0	0	0	0	0	0	0	0	0	0	0	0	5.54	0	0	0	0	0	0	0	0	0	6.027
97	40.58	0	0	0	0	0	0	6.97	0	0	0	0	0	0	0	0	0	0	0	0	52.44	0	0	0	0	0	0	0	0	0	0	0	4.25
98	41.33	0	0	0	0	0	0	21.32	0	0	0	0	0	0	0	0	0	0	37.35	0	0	0	0	0	0	0	0	0	0	0	0	0	4.993
99	46.68	0	0	0	0	0	0	24.08	0	0	0	0	0	0	0	0	0	29.24	0	0	0	0	0	0	0	0	0	0	0	0	0	0	5.351

## Sheet: Glass transition temperature
Glass ID	INPUT FEATURES																																					OUTPUT
	SiO2	B2O3	Al2O3	MgO	CaO	BaO	Li2O	Na2O	K2O	Ag2O	Cs2O	Tl2O	BeO	NiO	CuO	ZnO	CdO	PbO	Ga2O3	Y2O3	La2O3	Gd2O3	Bi2O3	TiO2	ZrO2	TeO2	P2O5	V2O5	Nb2O5	Ta2O5	MoO3	WO3	H2O	Sm2O3	MgF2	PbF2	PbCl2	Glass transition temperature (K)
1	0	0	0	0	0	0	0	0	0	0	0	0	0	0	0	0	0	0	0	0	0	0	0	0	0	0	1.57	98.43	0	0	0	0	0	0	0	0	0	479
2	0	0	0	0	0	0	0	0	0	0	0	0	0	0	0	0	0	0	0	0	0	0	0	0	0	0	3.15	96.85	0	0	0	0	0	0	0	0	0	493
3	0	0	0	0	0	0	0	0	0	0	0	0	0	0	0	0	0	0	0	0	0	0	0	0	0	0	14.4	85.6	0	0	0	0	0	0	0	0	0	509
4	0	0	0	0	0	0	0	0	0	0	0	0	0	0	0	0	0	0	0	0	0	0	0	0	0	0	15.64	84.36	0	0	0	0	0	0	0	0	0	531
5	0	0	0	0	0	0	0	0	0	0	0	0	0	0	0	0	0	0	0	0	0	0	0	0	0	0	18.3	81.7	0	0	0	0	0	0	0	0	0	976
6	0	0	0	0	0	0	0	0	0	0	0	0	0	0	0	0	0	0	0	0	0	0	0	0	0	0	19.77	80.23	0	0	0	0	0	0	0	0	0	596
7	0	0	0	0	0	0	0	0	0	0	0	0	0	0	0	0	0	0	0	0	0	0	0	0	0	0	19.78	0	0	0	80.22	0	0	0	0	0	0	659.25
8	0	0	0	0	0	0	0	0	0	0	0	0	0	0	0	0	0	0	0	0	0	0	0	0	0	0	20	80	0	0	0	0	0	0	0	0	0	567
9	0	0	0	0	0	0	0	0	0	0	0	0	0	0	0	0	0	0	0	0	0	0	0	0	0	0	20.1	17.17	62.73	0	0	0	0	0	0	0	0	888
10	0	0	0	0	0	0	0	0	0	0	0	0	0	0	0	0	0	0	0	0	0	0	0	0	0	0	20.76	79.24	0	0	0	0	0	0	0	0	0	553
11	0	0	0	0	0	0	0	0	0	0	0	0	0	0	0	0	0	0	0	0	0	0	0	0	0	0	20.78	0	0	0	0	79.22	0	0	0	0	0	930
12	0	0	0	0	0	0	0	0	0	0	0	0	0	0	0	0	0	0	0	0	0	0	0	0	0	0	23.67	50.55	0	0	0	25.78	0	0	0	0	0	622
13	0	0	0	0	0	0	0	0	0	0	0	0	0	0	0	0	0	0	0	0	0	0	0	0	0	0	26.23	56.03	0	0	17.74	0	0	0	0	0	0	588
14	0	0	0	0	0	0	0	0	0	0	0	0	0	0	0	0	0	0	0	0	0	0	0	0	0	0	28.06	71.94	0	0	0	0	0	0	0	0	0	583
15	0	0	0	0	0	0	0	0	0	0	0	0	0	0	0	0	0	0	0	0	0	0	0	0	0	0	28.98	0	0	0	0	71.02	0	0	0	0	0	783
16	0	0	0	0	0	0	0	0	0	0	0	0	0	0	0	0	0	0	0	0	0	0	0	0	0	0	29.59	70.41	0	0	0	0	0	0	0	0	0	583
17	0	0	0	0	0	0	0	0	0	0	0	0	0	0	0	0	0	0	0	0	0	0	0	0	0	0	29.68	70.32	0	0	0	0	0	0	0	0	0	988
18	0	0	0	0	0	0	0	0	0	0	0	0	0	0	0	0	0	0	0	0	0	0	0	0	0	0	29.71	0	0	0	70.29	0	0	0	0	0	0	697
19	0	0	0	0	0	0	0	0	0	0	0	0	0	0	0	0	0	0	0	0	0	0	0	0	0	0	31.24	68.76	0	0	0	0	0	0	0	0	0	955
20	0	0	0	0	0	0	0	0	0	0	0	0	0	0	0	0	0	0	0	0	0	0	0	0	0	0	32.14	0	0	0	0	0	0	0	0	67.86	0	621
21	0	0	0	0	0	0	0	0	0	0	0	0	0	0	0	0	0	0	0	0	0	0	0	0	0	0	35.07	64.93	0	0	0	0	0	0	0	0	0	616
22	0	0	0	0	0	0	0	0	0	0	0	0	0	0	0	0	0	0	0	0	0	0	0	0	0	0	36.77	63.23	0	0	0	0	0	0	0	0	0	983
23	0	0	0	0	0	0	0	0	0	0	0	0	0	0	0	0	0	0	0	0	0	0	0	0	0	0	38.97	61.03	0	0	0	0	0	0	0	0	0	643
24	0	0	0	0	0	0	0	0	0	0	0	0	0	0	0	0	0	0	0	0	0	0	0	0	0	0	39.66	0	0	0	60.34	0	0	0	0	0	0	760
25	0	0	0	0	0	0	0	0	0	0	0	0	0	0	0	0	0	0	0	0	0	0	0	0	0	0	39.93	60.07	0	0	0	0	0	0	0	0	0	665
26	0	0	0	0	0	0	0	0	0	0	0	0	0	0	0	0	0	0	0	0	0	0	0	0	0	0	40	60	0	0	0	0	0	0	0	0	0	617
27	0	0	0	0	0	0	0	0	0	0	0	0	0	0	0	0	0	0	0	0	0	0	0	0	0	0	41.51	58.49	0	0	0	0	0	0	0	0	0	468
28	0	0	0	0	0	0	0	0	0	0	0	0	0	0	0	0	0	0	0	0	0	0	0	0	0	0	41.58	58.42	0	0	0	0	0	0	0	0	0	692
29	0	0	0	0	0	0	0	0	0	0	0	0	0	0	0	0	0	0	0	0	0	0	0	0	0	0	46.11	53.89	0	0	0	0	0	0	0	0	0	692
30	0	0	0	0	0	0	0	0	0	0	0	0	0	0	0	0	0	0	0	0	0	0	0	0	0	0	46.12	53.88	0	0	0	0	0	0	0	0	0	688
31	0	0	0	0	0	0	0	0	0	0	0	0	0	0	0	0	0	0	0	0	0	0	0	0	0	0	47.81	52.19	0	0	0	0	0	0	0	0	0	665
32	0	0	0	0	0	0	0	0	0	0	0	0	0	0	0	0	0	0	0	0	0	0	0	0	0	0	47.91	52.09	0	0	0	0	0	0	0	0	0	671
33	0	0	0	0	0	0	0	0	0	0	0	0	0	0	0	0	0	0	0	0	0	0	0	0	0	0	49.65	0	0	0	50.35	0	0	0	0	0	0	709
34	0	0	0	0	0	0	0	0	0	0	0	0	0	0	0	0	0	0	0	0	0	0	0	0	0	0	50	0	0	0	50	0	0	0	0	0	0	803
35	0	0	0	0	0	0	0	0	0	0	0	0	0	0	0	0	0	0	0	0	0	0	0	0	0	0	51.15	48.85	0	0	0	0	0	0	0	0	0	983
36	0	0	0	0	0	0	0	0	0	0	0	0	0	0	0	0	0	0	0	0	0	0	0	0	0	0	53	47	0	0	0	0	0	0	0	0	0	616
37	0	0	0	0	0	0	0	0	0	0	0	0	0	0	0	0	0	0	0	0	0	0	0	0	0	0	54.14	45.86	0	0	0	0	0	0	0	0	0	641
38	0	0	0	0	0	0	0	0	0	0	0	0	0	0	0	0	0	0	0	0	0	0	0	0	0	0	54.98	0	0	0	0	0	0	45.02	0	0	0	933
39	0	0	0	0	0	0	0	0	0	0	0	0	0	0	0	0	0	0	0	0	0	0	0	0	0	0	57.27	42.73	0	0	0	0	0	0	0	0	0	955
40	0	0	0	0	0	0	0	0	0	0	0	0	0	0	0	0	0	0	0	0	0	0	0	0	0	0	58.22	41.78	0	0	0	0	0	0	0	0	0	1001
41	0	0	0	0	0	0	0	0	0	0	0	0	0	0	0	0	0	0	0	0	0	0	0	0	0	0	59.07	40.93	0	0	0	0	0	0	0	0	0	988
42	0	0	0	0	0	0	0	0	0	0	0	0	0	0	0	0	0	0	0	0	0	0	0	0	0	0	60.24	39.76	0	0	0	0	0	0	0	0	0	984
43	0	0	0	0	0	0	0	0	0	0	0	0	0	0	0	0	0	0	0	0	0	0	0	0	0	0	61.2	0	0	0	0	0	38.8	0	0	0	0	170
44	0	0	0	0	0	0	0	0	0	0	0	0	0	0	0	0	0	0	0	0	0	0	0	0	0	0	64.55	35.45	0	0	0	0	0	0	0	0	0	580
45	0	0	0	0	0	0	0	0	0	0	0	0	0	0	0	0	0	0	0	0	0	0	0	0	0	0	73.11	26.89	0	0	0	0	0	0	0	0	0	976
46	0	0	0	0	0	0	0	0	0	0	0	0	0	0	0	0	0	0	0	0	0	0	0	0	0	0	75.9	0	0	0	0	0	24.1	0	0	0	0	200
47	0	0	0	0	0	0	0	0	0	0	0	0	0	0	0	0	0	0	0	0	0	0	0	0	0	0	76.66	23.34	0	0	0	0	0	0	0	0	0	531
48	0	0	0	0	0	0	0	0	0	0	0	0	0	0	0	0	0	0	0	0	0	0	0	0	0	0	84	0	0	0	0	0	16	0	0	0	0	230
49	0	0	0	0	0	0	0	0	0	0	0	0	0	0	0	0	0	0	0	0	0	0	0	0	0	7.11	0	0	0	0	0	92.89	0	0	0	0	0	626
50	0	0	0	0	0	0	0	0	0	0	0	0	0	0	0	0	0	0	0	0	0	0	0	0	0	10	20	70	0	0	0	0	0	0	0	0	0	533
51	0	0	0	0	0	0	0	0	0	0	0	0	0	0	0	0	0	0	0	0	0	0	0	0	0	10.53	27.26	62.21	0	0	0	0	0	0	0	0	0	593
52	0	0	0	0	0	0	0	0	0	0	0	0	0	0	0	0	0	0	0	0	0	0	0	0	0	18	25	57	0	0	0	0	0	0	0	0	0	543
53	0	0	0	0	0	0	0	0	0	0	0	0	0	0	0	0	0	0	0	0	0	0	0	0	0	18.66	0	0	0	0	0	81.34	0	0	0	0	0	626
54	0	0	0	0	0	0	0	0	0	0	0	0	0	0	0	0	0	0	0	0	0	0	0	0	0	19.29	25.74	54.97	0	0	0	0	0	0	0	0	0	602
55	0	0	0	0	0	0	0	0	0	0	0	0	0	0	0	0	0	0	0	0	0	0	0	0	0	21.75	16.82	61.43	0	0	0	0	0	0	0	0	0	548
56	0	0	0	0	0	0	0	0	0	0	0	0	0	0	0	0	0	0	0	0	0	0	0	0	0	27.33	0	72.67	0	0	0	0	0	0	0	0	0	493
57	0	0	0	0	0	0	0	0	0	0	0	0	0	0	0	0	0	0	0	0	0	0	0	0	0	27.67	0	0	0	0	0	0	0	0	0	0	72.33	492
58	0	0	0	0	0	0	0	0	0	0	0	0	0	0	0	0	0	0	0	0	0	0	0	0	0	30.61	69.39	0	0	0	0	0	0	0	0	0	0	585
59	0	0	0	0	0	0	0	0	0	0	0	0	0	0	0	0	0	0	0	0	0	0	0	0	0	32.09	0	67.91	0	0	0	0	0	0	0	0	0	505
60	0	0	0	0	0	0	0	0	0	0	0	0	0	0	0	0	0	0	0	0	0	0	0	0	0	33.59	5.81	60.6	0	0	0	0	0	0	0	0	0	523
61	0	0	0	0	0	0	0	0	0	0	0	0	0	0	0	0	0	0	0	0	0	0	0	0	0	35	65	0	0	0	0	0	0	0	0	0	0	587
62	0	0	0	0	0	0	0	0	0	0	0	0	0	0	0	0	0	0	0	0	0	0	0	0	0	37.91	0	51.83	0	0	10.26	0	0	0	0	0	0	506
63	0	0	0	0	0	0	0	0	0	0	0	0	0	0	0	0	0	0	0	0	0	0	0	0	0	38.74	61.26	0	0	0	0	0	0	0	0	0	0	641
64	0	0	0	0	0	0	0	0	0	0	0	0	0	0	0	0	0	0	0	0	0	0	0	0	0	38.9	61.1	0	0	0	0	0	0	0	0	0	0	590
65	0	0	0	0	0	0	0	0	0	0	0	0	0	0	0	0	0	0	0	0	0	0	0	0	0	38.96	0	39.96	0	0	21.08	0	0	0	0	0	0	524
66	0	0	0	0	0	0	0	0	0	0	0	0	0	0	0	0	0	0	0	0	0	0	0	0	0	39.43	0	0	0	0	0	0	0	0	0	60.57	0	462
67	0	0	0	0	0	0	0	0	0	0	0	0	0	0	0	0	0	0	0	0	0	0	0	0	0	40.07	0	27.4	0	0	32.53	0	0	0	0	0	0	542
68	0	0	0	0	0	0	0	0	0	0	0	0	0	0	0	0	0	0	0	0	0	0	0	0	0	40.77	0	0	0	0	0	59.23	0	0	0	0	0	630
69	0	0	0	0	0	0	0	0	0	0	0	0	0	0	0	0	0	0	0	0	0	0	0	0	0	41.25	0	14.1	0	0	44.65	0	0	0	0	0	0	551
70	0	0	0	0	0	0	0	0	0	0	0	0	0	0	0	0	0	0	0	0	0	0	0	0	0	42.5	0	0	0	0	57.5	0	0	0	0	0	0	577
71	0	0	0	0	0	0	0	0	0	0	0	0	0	0	0	0	0	0	0	0	0	0	0	0	0	43.01	56.99	0	0	0	0	0	0	0	0	0	0	592
72	0	0	0	0	0	0	0	0	0	0	0	0	0	0	0	0	0	0	0	0	0	0	0	0	0	43.46	56.54	0	0	0	0	0	0	0	0	0	0	649
73	0	0	0	0	0	0	0	0	0	0	0	0	0	0	0	0	0	0	0	0	0	0	0	0	0	46.74	0	53.26	0	0	0	0	0	0	0	0	0	504.5
74	0	0	0	0	0	0	0	0	0	0	0	0	0	0	0	0	0	0	0	0	0	0	0	0	0	47.78	0	0	0	0	0	0	0	0	0	24.47	27.75	553
75	0	0	0	0	0	0	0	0	0	0	0	0	0	0	0	0	0	0	0	0	0	0	0	0	0	48.52	51.48	0	0	0	0	0	0	0	0	0	0	665
76	0	0	0	0	0	0	0	0	0	0	0	0	0	0	0	0	0	0	0	0	0	0	0	0	0	48.64	51.36	0	0	0	0	0	0	0	0	0	0	595
77	0	0	0	0	0	0	0	0	0	0	0	0	0	0	0	0	0	0	0	0	0	0	0	0	0	50	0	50	0	0	0	0	0	0	0	0	0	503.8
78	0	0	0	0	0	0	0	0	0	0	0	0	0	0	0	0	0	0	0	0	0	0	0	0	0	50.8	0	0	0	0	0	49.2	0	0	0	0	0	663
79	0	0	0	0	0	0	0	0	0	0	0	0	0	0	0	0	0	0	0	0	0	0	0	0	0	51.75	0	48.25	0	0	0	0	0	0	0	0	0	785
80	0	0	0	0	0	0	0	0	0	0	0	0	0	0	0	0	0	0	0	0	0	0	0	0	0	53.43	46.57	0	0	0	0	0	0	0	0	0	0	672
81	0	0	0	0	0	0	0	0	0	0	0	0	0	0	0	0	0	0	0	0	0	0	0	0	0	55.46	44.54	0	0	0	0	0	0	0	0	0	0	600
82	0	0	0	0	0	0	0	0	0	0	0	0	0	0	0	0	0	0	0	0	0	0	0	0	0	55.85	44.15	0	0	0	0	0	0	0	0	0	0	641
83	0	0	0	0	0	0	0	0	0	0	0	0	0	0	0	0	0	0	0	0	0	0	0	0	0	56	0	37	7	0	0	0	0	0	0	0	0	553
84	0	0	0	0	0	0	0	0	0	0	0	0	0	0	0	0	0	0	0	0	0	0	0	0	0	56.11	0	0	0	0	0	43.89	0	0	0	0	0	643
85	0	0	0	0	0	0	0	0	0	0	0	0	0	0	0	0	0	0	0	0	0	0	0	0	0	57.25	0	0	0	0	0	0	0	0	0	0	42.75	571
86	0	0	0	0	0	0	0	0	0	0	0	0	0	0	0	0	0	0	0	0	0	0	0	0	0	58.4	0	41.6	0	0	0	0	0	0	0	0	0	524
87	0	0	0	0	0	0	0	0	0	0	0	0	0	0	0	0	0	0	0	0	0	0	0	0	0	58.57	41.43	0	0	0	0	0	0	0	0	0	0	672
88	0	0	0	0	0	0	0	0	0	0	0	0	0	0	0	0	0	0	0	0	0	0	0	0	0	60.3	0	0	0	0	0	0	0	0	0	39.7	0	509
89	0	0	0	0	0	0	0	0	0	0	0	0	0	0	0	0	0	0	0	0	0	0	0	0	0	60.58	39.42	0	0	0	0	0	0	0	0	0	0	649
90	0	0	0	0	0	0	0	0	0	0	0	0	0	0	0	0	0	0	0	0	0	0	0	0	0	61.63	0	0	0	0	0	38.37	0	0	0	0	0	641.2
91	0	0	0	0	0	0	0	0	0	0	0	0	0	0	0	0	0	0	0	0	0	0	0	0	0	62	38	0	0	0	0	0	0	0	0	0	0	659
92	0	0	0	0	0	0	0	0	0	0	0	0	0	0	0	0	0	0	0	0	0	0	0	0	0	62.21	37.79	0	0	0	0	0	0	0	0	0	0	606
93	0	0	0	0	0	0	0	0	0	0	0	0	0	0	0	0	0	0	0	0	0	0	0	0	0	62.45	0	0	0	0	37.55	0	0	0	0	0	0	583
94	0	0	0	0	0	0	0	0	0	0	0	0	0	0	0	0	0	0	0	0	0	0	0	0	0	63.7	0	36.3	0	0	0	0	0	0	0	0	0	534
95	0	0	0	0	0	0	0	0	0	0	0	0	0	0	0	0	0	0	0	0	0	0	0	0	0	63.71	0	36.29	0	0	0	0	0	0	0	0	0	531.667
96	0	0	0	0	0	0	0	0	0	0	0	0	0	0	0	0	0	0	0	0	0	0	0	0	0	65.34	34.66	0	0	0	0	0	0	0	0	0	0	665
97	0	0	0	0	0	0	0	0	0	0	0	0	0	0	0	0	0	0	0	0	0	0	0	0	0	65.5	34.5	0	0	0	0	0	0	0	0	0	0	609
98	0	0	0	0	0	0	0	0	0	0	0	0	0	0	0	0	0	0	0	0	0	0	0	0	0	66.2	0	18.87	0	0	14.93	0	0	0	0	0	0	556.5
99	0	0	0	0	0	0	0	0	0	0	0	0	0	0	0	0	0	0	0	0	0	0	0	0	0	66.21	0	0	0	0	0	33.79	0	0	0	0	0	634

## Sheet: Density
Glass ID	INPUT FEATURES																																					OUTPUT
	SiO2	B2O3	Al2O3	MgO	CaO	BaO	Li2O	Na2O	K2O	Ag2O	Cs2O	Tl2O	BeO	NiO	CuO	ZnO	CdO	PbO	Ga2O3	Y2O3	La2O3	Gd2O3	Bi2O3	TiO2	ZrO2	TeO2	P2O5	V2O5	Nb2O5	Ta2O5	MoO3	WO3	H2O	Sm2O3	MgF2	PbF2	PbCl2	Density (g/cm3)
1	0	0	0	0	0	0	0	0	0	0	0	0	0	0	0	0	0	0	0	0	0	0	0	0	0	0	0	0	26.58	0	0	73.42	0	0	0	0	0	6.83
2	0	0	0	0	0	0	0	0	0	0	0	0	0	0	0	0	0	0	0	0	0	0	0	0	0	0	0	98.32	0	0	0	0	0	0	0	0	0	2.97
3	0	0	0	0	0	0	0	0	0	0	0	0	0	0	0	0	0	0	0	0	0	0	0	0	0	0	0	100	0	0	0	0	0	0	0	0	0	2.95667
4	0	0	0	0	0	0	0	0	0	0	0	0	0	0	0	0	0	0	0	0	0	0	0	0	0	0	3.89	94.67	0	0	0	0	0	0	0	0	0	3.211
5	0	0	0	0	0	0	0	0	0	0	0	0	0	0	0	0	0	0	0	0	0	0	0	0	0	0	3.94	96.05	0	0	0	0	0	0	0	0	0	2.928
6	0	0	0	0	0	0	0	0	0	0	0	0	0	0	0	0	0	0	0	0	0	0	0	0	0	0	5.75	78.59	0	0	0	15.65	0	0	0	0	0	3.15
7	0	0	0	0	0	0	0	0	0	0	0	0	0	0	0	0	0	0	0	0	0	0	0	0	0	0	6.51	8.35	0	0	0	85.14	0	0	0	0	0	5.25
8	0	0	0	0	0	0	0	0	0	0	0	0	0	0	0	0	0	0	0	0	0	0	0	0	0	0	7.65	92.35	0	0	0	0	0	0	0	0	0	2.96
9	0	0	0	0	0	0	0	0	0	0	0	0	0	0	0	0	0	0	0	0	0	0	0	0	0	0	7.76	79.56	0	0	0	12.68	0	0	0	0	0	3.11
10	0	0	0	0	0	0	0	0	0	0	0	0	0	0	0	0	0	0	0	0	0	0	0	0	0	0	8.18	6.29	0	0	0	85.53	0	0	0	0	0	5.13
11	0	0	0	0	0	0	0	0	0	0	0	0	0	0	0	0	0	0	0	0	0	0	0	0	0	0	8.37	91.63	0	0	0	0	0	0	0	0	0	3.125
12	0	0	0	0	0	0	0	0	0	0	0	0	0	0	0	0	0	0	0	0	0	0	0	0	0	0	9.74	90.26	0	0	0	0	0	0	0	0	0	3.087
13	0	0	0	0	0	0	0	0	0	0	0	0	0	0	0	0	0	0	0	0	0	0	0	0	0	0	9.86	4.21	0	0	0	85.92	0	0	0	0	0	5.04
14	0	0	0	0	0	0	0	0	0	0	0	0	0	0	0	0	0	0	0	0	0	0	0	0	0	0	9.86	90.13	0	0	0	0	0	0	0	0	0	2.913
15	0	0	0	0	0	0	0	0	0	0	0	0	0	0	0	0	0	0	0	0	0	0	0	0	0	0	10.03	89.97	0	0	0	0	0	0	0	0	0	2.92
16	0	0	0	0	0	0	0	0	0	0	0	0	0	0	0	0	0	0	0	0	0	0	0	0	0	0	10.22	89.78	0	0	0	0	0	0	0	0	0	2.921
17	0	0	0	0	0	0	0	0	0	0	0	0	0	0	0	0	0	0	0	0	0	0	0	0	0	0	10.87	74.32	0	0	0	14.8	0	0	0	0	0	3.15
18	0	0	0	0	0	0	0	0	0	0	0	0	0	0	0	0	0	0	0	0	0	0	0	0	0	0	11.56	2.12	0	0	0	86.32	0	0	0	0	0	4.94
19	0	0	0	0	0	0	0	0	0	0	0	0	0	0	0	0	0	0	0	0	0	0	0	0	0	0	11.93	81.57	0	0	0	6.5	0	0	0	0	0	2.95
20	0	0	0	0	0	0	0	0	0	0	0	0	0	0	0	0	0	0	0	0	0	0	0	0	0	0	12.1	87.9	0	0	0	0	0	0	0	0	0	2.95
21	0	0	0	0	0	0	0	0	0	0	0	0	0	0	0	0	0	0	0	0	0	0	0	0	0	0	12.24	1.27	0	0	0	86.48	0	0	0	0	0	4.86
22	0	0	0	0	0	0	0	0	0	0	0	0	0	0	0	0	0	0	0	0	0	0	0	0	0	0	12.52	87.48	0	0	0	0	0	0	0	0	0	3.776
23	0	0	0	0	0	0	0	0	0	0	0	0	0	0	0	0	0	0	0	0	0	0	0	0	0	0	12.59	0.85	0	0	0	86.56	0	0	0	0	0	4.82
24	0	0	0	0	0	0	0	0	0	0	0	0	0	0	0	0	0	0	0	0	0	0	0	0	0	0	12.91	0	0	0	0	87.08	0	0	0	0	0	5.58
25	0	0	0	0	0	0	0	0	0	0	0	0	0	0	0	0	0	0	0	0	0	0	0	0	0	0	12.93	0.42	0	0	0	86.64	0	0	0	0	0	4.74
26	0	0	0	0	0	0	0	0	0	0	0	0	0	0	0	0	0	0	0	0	0	0	0	0	0	0	13.27	0	0	0	0	86.73	0	0	0	0	0	5.608
27	0	0	0	0	0	0	0	0	0	0	0	0	0	0	0	0	0	0	0	0	0	0	0	0	0	0	13.41	0	0	0	1.74	84.84	0	0	0	0	0	5.02
28	0	0	0	0	0	0	0	0	0	0	0	0	0	0	0	0	0	0	0	0	0	0	0	0	0	0	13.45	6.17	0	0	0	80.37	0	0	0	0	0	5.25
29	0	0	0	0	0	0	0	0	0	0	0	0	0	0	0	0	0	0	0	0	0	0	0	0	0	0	13.5	86.5	0	0	0	0	0	0	0	0	0	3.06
30	0	0	0	0	0	0	0	0	0	0	0	0	0	0	0	0	0	0	0	0	0	0	0	0	0	0	14.03	0	0	0	85.97	0	0	0	0	0	0	3.67
31	0	0	0	0	0	0	0	0	0	0	0	0	0	0	0	0	0	0	0	0	0	0	0	0	0	0	14.37	85.63	0	0	0	0	0	0	0	0	0	2.88
32	0	0	0	0	0	0	0	0	0	0	0	0	0	0	0	0	0	0	0	0	0	0	0	0	0	0	14.4	73.83	0	0	0	11.76	0	0	0	0	0	3.11
33	0	0	0	0	0	0	0	0	0	0	0	0	0	0	0	0	0	0	0	0	0	0	0	0	0	0	14.4	85.6	0	0	0	0	0	0	0	0	0	2.88
34	0	0	0	0	0	0	0	0	0	0	0	0	0	0	0	0	0	0	0	0	0	0	0	0	0	0	14.54	82.82	0	0	0	2.64	0	0	0	0	0	2.91
35	0	0	0	0	0	0	0	0	0	0	0	0	0	0	0	0	0	0	0	0	0	0	0	0	0	0	14.62	0	0	0	85.38	0	0	0	0	0	0	3.695
36	0	0	0	0	0	0	0	0	0	0	0	0	0	0	0	0	0	0	0	0	0	0	0	0	0	0	14.63	85.37	0	0	0	0	0	0	0	0	0	2.71
37	0	0	0	0	0	0	0	0	0	0	0	0	0	0	0	0	0	0	0	0	0	0	0	0	0	0	14.79	85.2	0	0	0	0	0	0	0	0	0	2.933
38	0	0	0	0	0	0	0	0	0	0	0	0	0	0	0	0	0	0	0	0	0	0	0	0	0	0	15.12	5.82	0	0	0	79.06	0	0	0	0	0	5.13
39	0	0	0	0	0	0	0	0	0	0	0	0	0	0	0	0	0	0	0	0	0	0	0	0	0	0	15.24	0	0	0	0	84.76	0	0	0	0	0	5.39
40	0	0	0	0	0	0	0	0	0	0	0	0	0	0	0	0	0	0	0	0	0	0	0	0	0	0	15.43	83.24	0	0	0	1.33	0	0	0	0	0	2.87
41	0	0	0	0	0	0	0	0	0	0	0	0	0	0	0	0	0	0	0	0	0	0	0	0	0	0	15.64	84.36	0	0	0	0	0	0	0	0	0	2.925
42	0	0	0	0	0	0	0	0	0	0	0	0	0	0	0	0	0	0	0	0	0	0	0	0	0	0	16.32	83.67	0	0	0	0	0	0	0	0	0	2.91967
43	0	0	0	0	0	0	0	0	0	0	0	0	0	0	0	0	0	0	0	0	0	0	0	0	0	0	17.02	0	0	0	0	82.98	0	0	0	0	0	5.31
44	0	0	0	0	0	0	0	0	0	0	0	0	0	0	0	0	0	0	0	0	0	0	0	0	0	0	17.61	82.39	0	0	0	0	0	0	0	0	0	3.021
45	0	0	0	0	0	0	0	0	0	0	0	0	0	0	0	0	0	0	0	0	0	0	0	0	0	0	17.77	0	0	0	0	82.23	0	0	0	0	0	5.16
46	0	0	0	0	0	0	0	0	0	0	0	0	0	0	0	0	0	0	0	0	0	0	0	0	0	0	17.78	0	0	0	0	82.22	0	0	0	0	0	5.16
47	0	0	0	0	0	0	0	0	0	0	0	0	0	0	0	0	0	0	0	0	0	0	0	0	0	0	17.98	82.02	0	0	0	0	0	0	0	0	0	3.02
48	0	0	0	0	0	0	0	0	0	0	0	0	0	0	0	0	0	0	0	0	0	0	0	0	0	0	18.18	3	0	0	0	78.83	0	0	0	0	0	5.04
49	0	0	0	0	0	0	0	0	0	0	0	0	0	0	0	0	0	0	0	0	0	0	0	0	0	0	18.78	0	0	0	81.21	0	0	0	0	0	0	3.593
50	0	0	0	0	0	0	0	0	0	0	0	0	0	0	0	0	0	0	0	0	0	0	0	0	0	0	18.79	0	0	0	81.21	0	0	0	0	0	0	3.606
51	0	0	0	0	0	0	0	0	0	0	0	0	0	0	0	0	0	0	0	0	0	0	0	0	0	0	19.42	0	0	0	1.62	78.96	0	0	0	0	0	5.02
52	0	0	0	0	0	0	0	0	0	0	0	0	0	0	0	0	0	0	0	0	0	0	0	0	0	0	20.62	0	0	0	0	79.38	0	0	0	0	0	5
53	0	0	0	0	0	0	0	0	0	0	0	0	0	0	0	0	0	0	0	0	0	0	0	0	0	0	20.63	0	0	0	0	79.37	0	0	0	0	0	5
54	0	0	0	0	0	0	0	0	0	0	0	0	0	0	0	0	0	0	0	0	0	0	0	0	0	0	20.73	79.27	0	0	0	0	0	0	0	0	0	2.869
55	0	0	0	0	0	0	0	0	0	0	0	0	0	0	0	0	0	0	0	0	0	0	0	0	0	0	20.76	79.24	0	0	0	0	0	0	0	0	0	2.86
56	0	0	0	0	0	0	0	0	0	0	0	0	0	0	0	0	0	0	0	0	0	0	0	0	0	0	20.86	1.34	0	0	0	77.8	0	0	0	0	0	4.88
57	0	0	0	0	0	0	0	0	0	0	0	0	0	0	0	0	0	0	0	0	0	0	0	0	0	0	20.99	79.01	0	0	0	0	0	0	0	0	0	2.745
58	0	0	0	0	0	0	0	0	0	0	0	0	0	0	0	0	0	0	0	0	0	0	0	0	0	0	21.32	1.45	0	0	0	77.23	0	0	0	0	0	4.94
59	0	0	0	0	0	0	0	0	0	0	0	0	0	0	0	0	0	0	0	0	0	0	0	0	0	0	21.32	72.87	0	0	0	5.81	0	0	0	0	0	2.95
60	0	0	0	0	0	0	0	0	0	0	0	0	0	0	0	0	0	0	0	0	0	0	0	0	0	0	21.52	78.48	0	0	0	0	0	0	0	0	0	2.99
61	0	0	0	0	0	0	0	0	0	0	0	0	0	0	0	0	0	0	0	0	0	0	0	0	0	0	21.81	1.14	0	0	0	77.05	0	0	0	0	0	4.86
62	0	0	0	0	0	0	0	0	0	0	0	0	0	0	0	0	0	0	0	0	0	0	0	0	0	0	22.84	77.16	0	0	0	0	0	0	0	0	0	2.75
63	0	0	0	0	0	0	0	0	0	0	0	0	0	0	0	0	0	0	0	0	0	0	0	0	0	0	23.01	0	0	0	0	76.99	0	0	0	0	0	4.76
64	0	0	0	0	0	0	0	0	0	0	0	0	0	0	0	0	0	0	0	0	0	0	0	0	0	0	23.21	0.58	0	0	0	76.21	0	0	0	0	0	4.82
65	0	0	0	0	0	0	0	0	0	0	0	0	0	0	0	0	0	0	0	0	0	0	0	0	0	0	23.28	76.72	0	0	0	0	0	0	0	0	0	2.98
66	0	0	0	0	0	0	0	0	0	0	0	0	0	0	0	0	0	0	0	0	0	0	0	0	0	0	23.36	0.23	0	0	0	76.4	0	0	0	0	0	4.74
67	0	0	0	0	0	0	0	0	0	0	0	0	0	0	0	0	0	0	0	0	0	0	0	0	0	0	23.41	0	0	0	0	76.59	0	0	0	0	0	4.927
68	0	0	0	0	0	0	0	0	0	0	0	0	0	0	0	0	0	0	0	0	0	0	0	0	0	0	23.43	0	0	0	0	76.57	0	0	0	0	0	4.78
69	0	0	0	0	0	0	0	0	0	0	0	0	0	0	0	0	0	0	0	0	0	0	0	0	0	0	23.49	0	0	0	0	76.51	0	0	0	0	0	4.78
70	0	0	0	0	0	0	0	0	0	0	0	0	0	0	0	0	0	0	0	0	0	0	0	0	0	0	23.75	0	0	0	76.25	0	0	0	0	0	0	3.498
71	0	0	0	0	0	0	0	0	0	0	0	0	0	0	0	0	0	0	0	0	0	0	0	0	0	0	24.14	0	0	0	75.86	0	0	0	0	0	0	3.47
72	0	0	0	0	0	0	0	0	0	0	0	0	0	0	0	0	0	0	0	0	0	0	0	0	0	0	24.71	0	0	0	0	75.29	0	0	0	0	0	5.04
73	0	0	0	0	0	0	0	0	0	0	0	0	0	0	0	0	0	0	0	0	0	0	0	0	0	0	25.12	0	0	0	0	74.88	0	0	0	0	0	5.3
74	0	0	0	0	0	0	0	0	0	0	0	0	0	0	0	0	0	0	0	0	0	0	0	0	0	0	25.39	0	0	0	0	0	0	0	0	0	74.61	5.67
75	0	0	0	0	0	0	0	0	0	0	0	0	0	0	0	0	0	0	0	0	0	0	0	0	0	0	25.39	72.31	0	0	0	2.3	0	0	0	0	0	2.91
76	0	0	0	0	0	0	0	0	0	0	0	0	0	0	0	0	0	0	0	0	0	0	0	0	0	0	26.26	73.74	0	0	0	0	0	0	0	0	0	2.903
77	0	0	0	0	0	0	0	0	0	0	0	0	0	0	0	0	0	0	0	0	0	0	0	0	0	0	26.73	0	0	0	73.27	0	0	0	0	0	0	3.425
78	0	0	0	0	0	0	0	0	0	0	0	0	0	0	0	0	0	0	0	0	0	0	0	0	0	0	26.73	72.12	0	0	0	1.15	0	0	0	0	0	2.87
79	0	0	0	0	0	0	0	0	0	0	0	0	0	0	0	0	0	0	0	0	0	0	0	0	0	0	27.16	72.84	0	0	0	0	0	0	0	0	0	2.92
80	0	0	0	0	0	0	0	0	0	0	0	0	0	0	0	0	0	0	0	0	0	0	0	0	0	0	27.76	72.23	0	0	0	0	0	0	0	0	0	2.94
81	0	0	0	0	0	0	0	0	0	0	0	0	0	0	0	0	0	0	0	0	0	0	0	0	0	0	28.91	0	0	0	71.09	0	0	0	0	0	0	3.29
82	0	0	0	0	0	0	0	0	0	0	0	0	0	0	0	0	0	0	0	0	0	0	0	0	0	0	28.98	0	0	0	0	71.01	0	0	0	0	0	4.86
83	0	0	0	0	0	0	0	0	0	0	0	0	0	0	0	0	0	0	0	0	0	0	0	0	0	0	29.68	70.32	0	0	0	0	0	0	0	0	0	2.764
84	0	0	0	0	0	0	0	0	0	0	0	0	0	0	0	0	0	0	0	0	0	0	0	0	0	0	29.91	0	0	0	70.09	0	0	0	0	0	0	3.373
85	0	0	0	0	0	0	0	0	0	0	0	0	0	0	0	0	0	0	0	0	0	0	0	0	0	0	30.01	69.99	0	0	0	0	0	0	0	0	0	2.892
86	0	0	0	0	0	0	0	0	0	0	0	0	0	0	0	0	0	0	0	0	0	0	0	0	0	0	30.02	0	0	0	0	69.98	0	0	0	0	0	5.13
87	0	0	0	0	0	0	0	0	0	0	0	0	0	0	0	0	0	0	0	0	0	0	0	0	0	0	30.2	0	0	0	69.79	0	0	0	0	0	0	3.35467
88	0	0	0	0	0	0	0	0	0	0	0	0	0	0	0	0	0	0	0	0	0	0	0	0	0	0	30.2	0	0	0	69.8	0	0	0	0	0	0	3.356
89	0	0	0	0	0	0	0	0	0	0	0	0	0	0	0	0	0	0	0	0	0	0	0	0	0	0	30.41	69.58	0	0	0	0	0	0	0	0	0	2.768
90	0	0	0	0	0	0	0	0	0	0	0	0	0	0	0	0	0	0	0	0	0	0	0	0	0	0	31.24	68.76	0	0	0	0	0	0	0	0	0	2.792
91	0	0	0	0	0	0	0	0	0	0	0	0	0	0	0	0	0	0	0	0	0	0	0	0	0	0	31.43	68.57	0	0	0	0	0	0	0	0	0	2.93
92	0	0	0	0	0	0	0	0	0	0	0	0	0	0	0	0	0	0	0	0	0	0	0	0	0	0	31.5	0	0	0	0	68.49	0	0	0	0	0	4.632
93	0	0	0	0	0	0	0	0	0	0	0	0	0	0	0	0	0	0	0	0	0	0	0	0	0	0	31.83	68.16	0	0	0	0	0	0	0	0	0	2.882
94	0	0	0	0	0	0	0	0	0	0	0	0	0	0	0	0	0	0	0	0	0	0	0	0	0	0	32.48	0	0	0	0	67.52	0	0	0	0	0	4.87
95	0	0	0	0	0	0	0	0	0	0	0	0	0	0	0	0	0	0	0	0	0	0	0	0	0	0	33.29	66.71	0	0	0	0	0	0	0	0	0	2.92
96	0	0	0	0	0	0	0	0	0	0	0	0	0	0	0	0	0	0	0	0	0	0	0	0	0	0	33.71	66.29	0	0	0	0	0	0	0	0	0	2.862
97	0	0	0	0	0	0	0	0	0	0	0	0	0	0	0	0	0	0	0	0	0	0	0	0	0	0	33.88	0	0	0	66.11	0	0	0	0	0	0	3.28467
98	0	0	0	0	0	0	0	0	0	0	0	0	0	0	0	0	0	0	0	0	0	0	0	0	0	0	33.89	0	0	0	66.11	0	0	0	0	0	0	3.282
99	0	0	0	0	0	0	0	0	0	0	0	0	0	0	0	0	0	0	0	0	0	0	0	0	0	0	34.08	0	0	0	65.91	0	0	0	0	0	0	3.283
